# Supplementary material
Source: HighWire-hosted journal article supplement (https://bmjopen.bmj.com/content/6/4/e010627)
Supplement: inline-supplementary-material-2 [file inline-supplementary-material-2.pdf]

### Index for supplementary figures

| Comparison Items          | Page Number of Forest plot | Page Number of Funnel plot |
|---------------------------|----------------------------|----------------------------|
| Operative time            | 1                          | 2                          |
| Single tract              | 3                          | 4                          |
| Requiring multiple tracts | 5                          | 6                          |
| Needing metal dilator     | 7                          | 8                          |
| Tract establishing time   | 9                          | 10                         |
| Fluoroscopic time         | 11                         | 12                         |
| Analgesics demand         | 13                         | 14                         |
| Hemoglobin drop           | 15                         | 16                         |
| Hemorrhage                | 17                         | 18                         |
| Fever                     | 19                         | 20                         |
| Hemo-/Hydro-/Pneumothorax | 21                         | 22                         |
| Blood transfusion         | 23                         | 24                         |
| Urinary tract infection   | 25                         | 26                         |
| Sepsis                    | 27                         | 28                         |
| Angiographic embolization | 29                         | 30                         |
| Total complications       | 31                         | 32                         |
| Hospital stay(d)          | 33                         | 34                         |
| Secondary procedure       | 35                         | 36                         |
| Initial stone-free rate   | 37                         | 38                         |
| Final stone-free rate     | 39                         | 40                         |
| Supracostal access        | 41                         | 42                         |

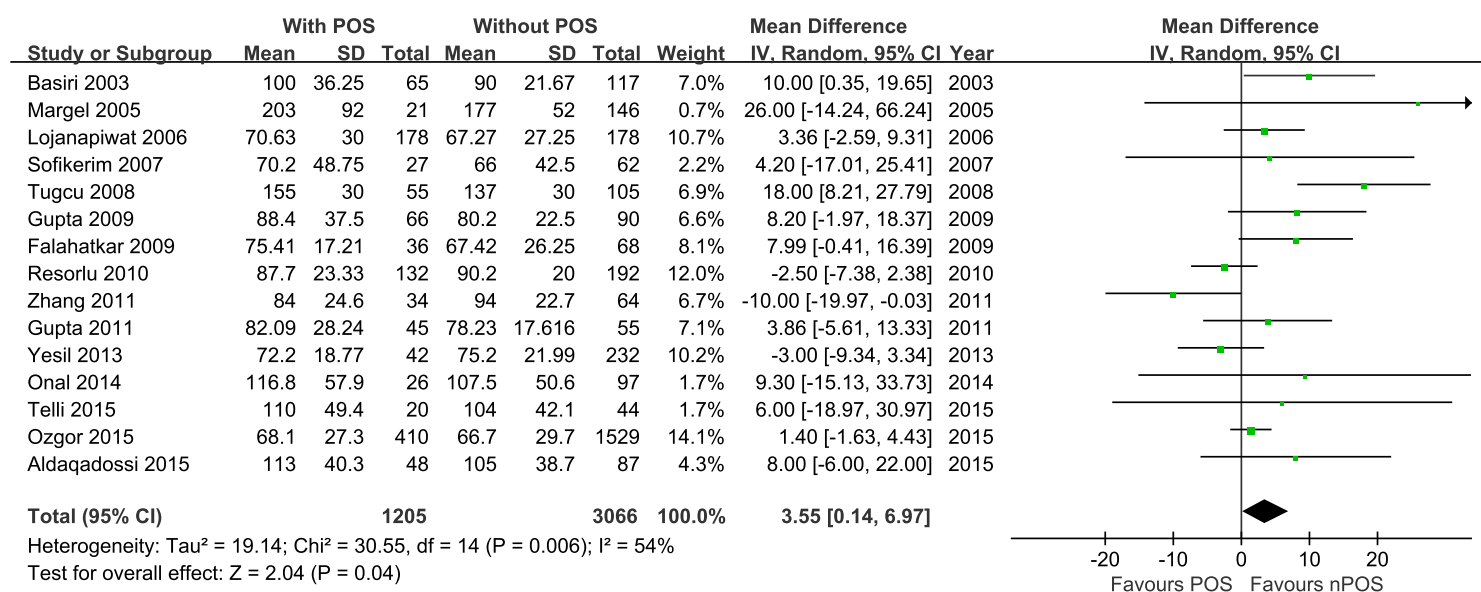

**Supplementary Figure 1.** Forest plot of the comparison for operative time. CI, confidence interval; IV, inverse variance; (n) POS, (non-) previous open surgery; SD, standard deviation.

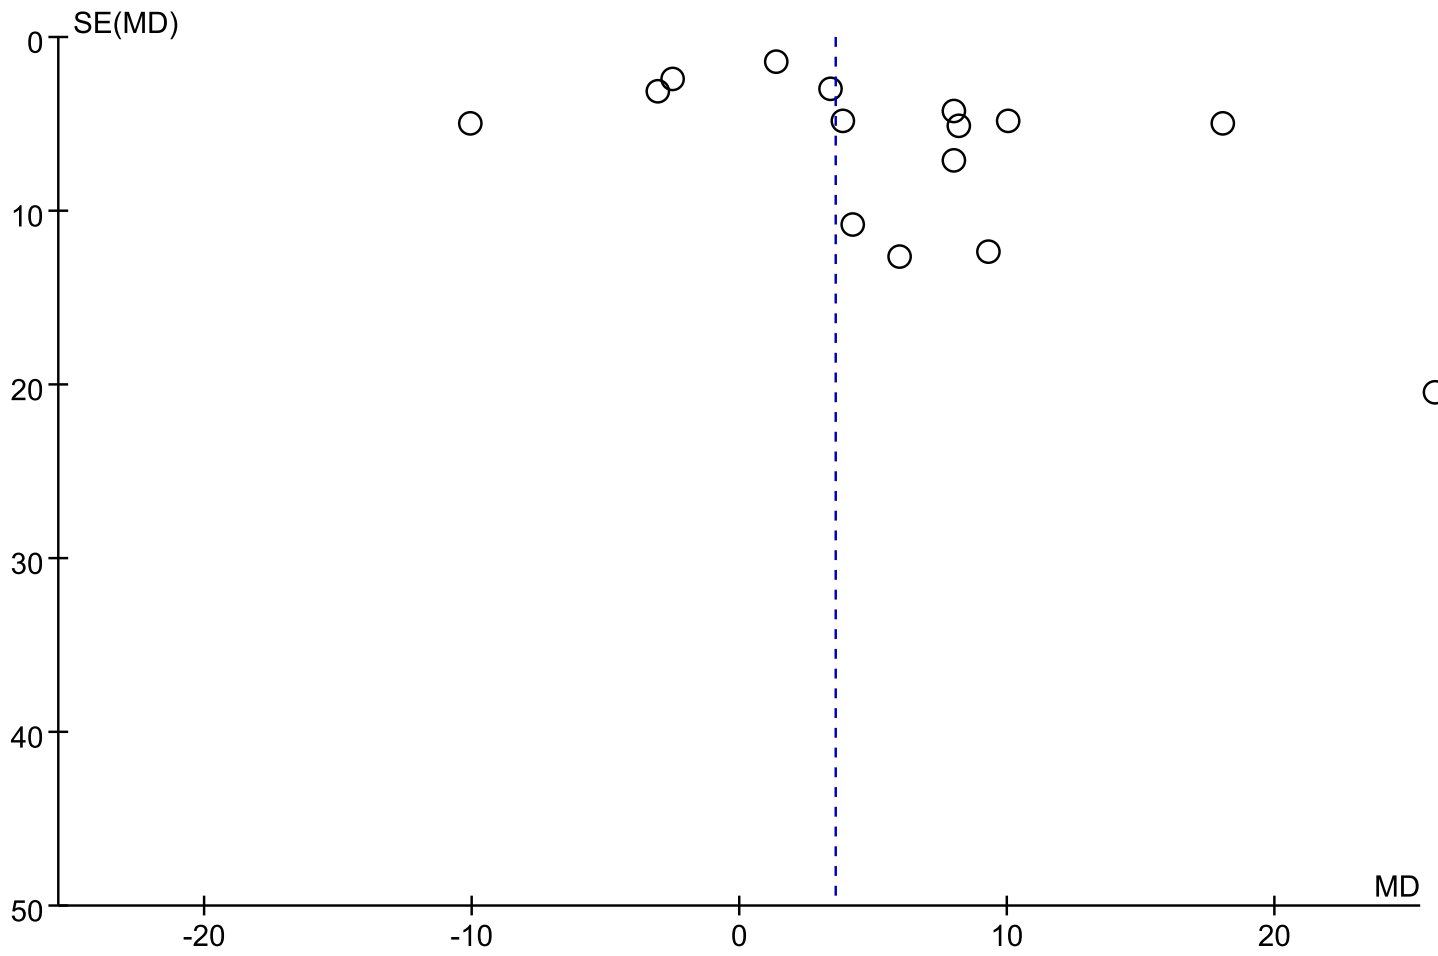

**Supplementary Figure 2.** Funnel plot of the comparison for operative time.

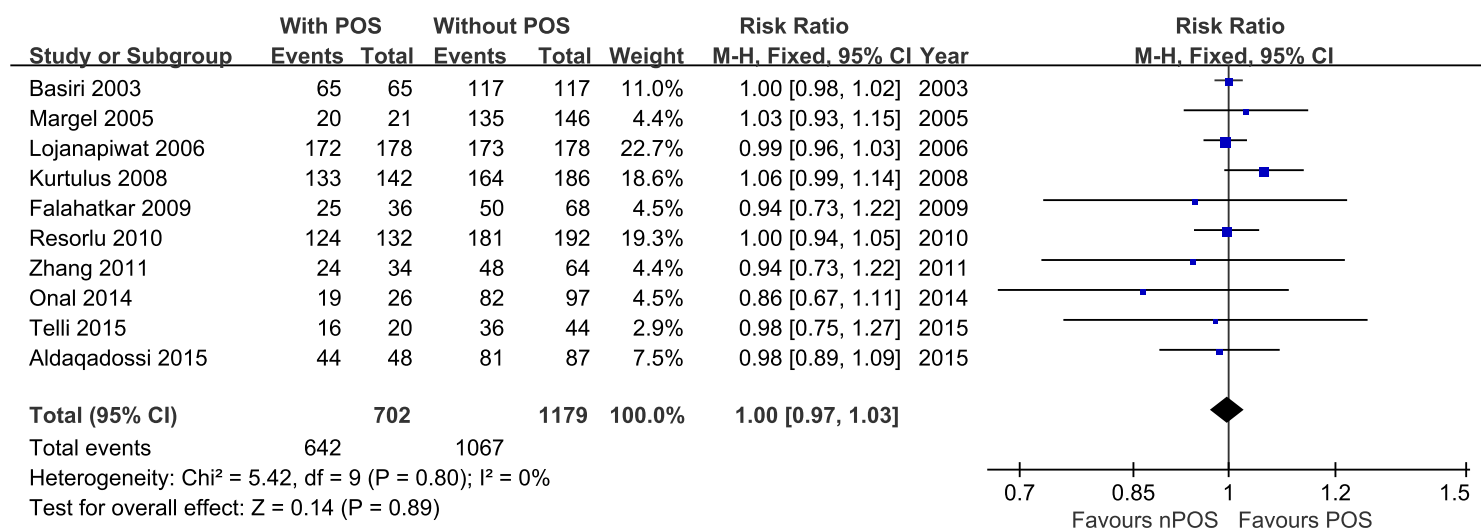

**Supplementary Figure 3.** Forest plot of the comparison for single tract. CI, confidence interval; M-H, Mantel-Haenszel; (n)POS, (non-) previous open surgery.

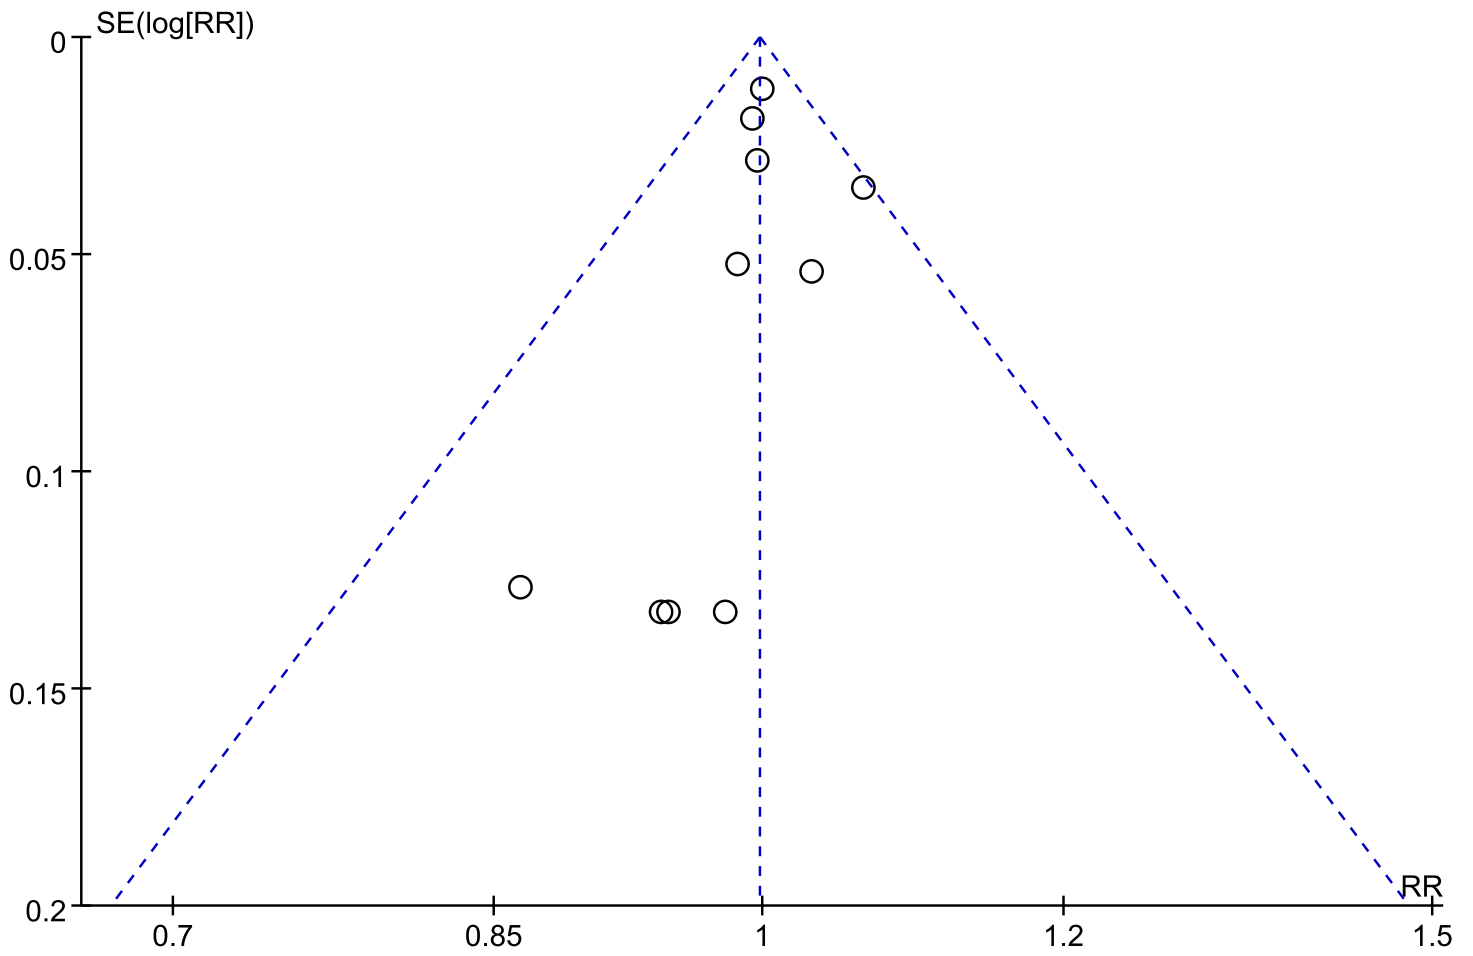

**Supplementary Figure 4.** Funnel plot of the comparison for single tract.

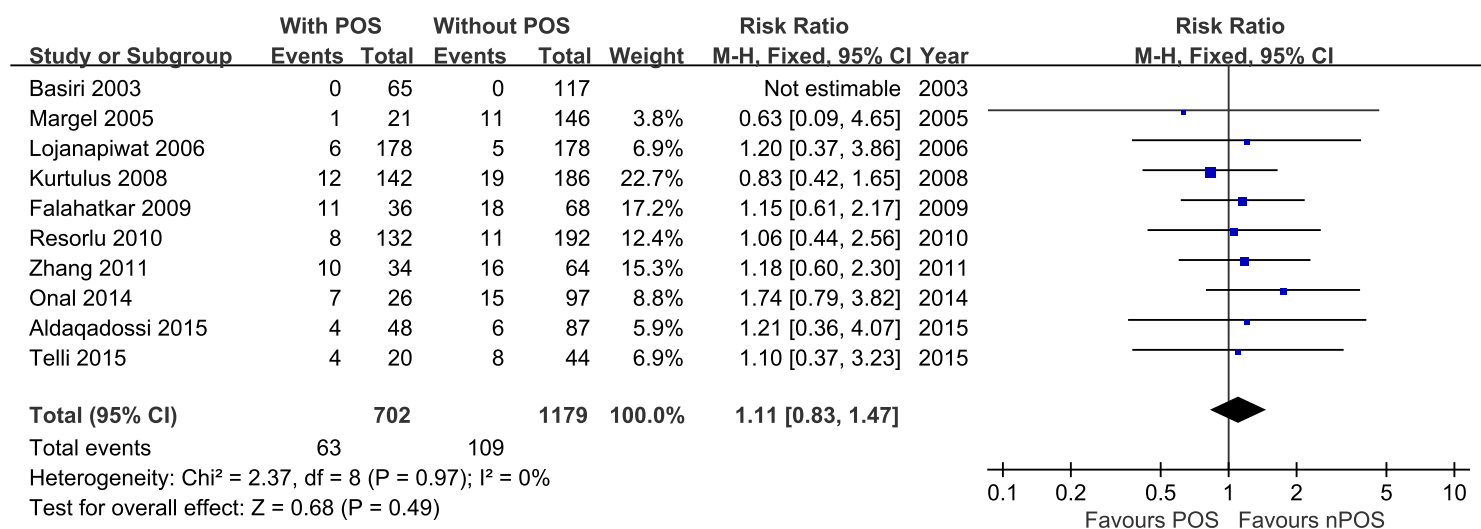

**Supplementary Figure 5.** Forest plot of the comparison for multiple tracts. CI, confidence interval; M-H, Mantel-Haenszel; (n)POS, (non-) previous open surgery.

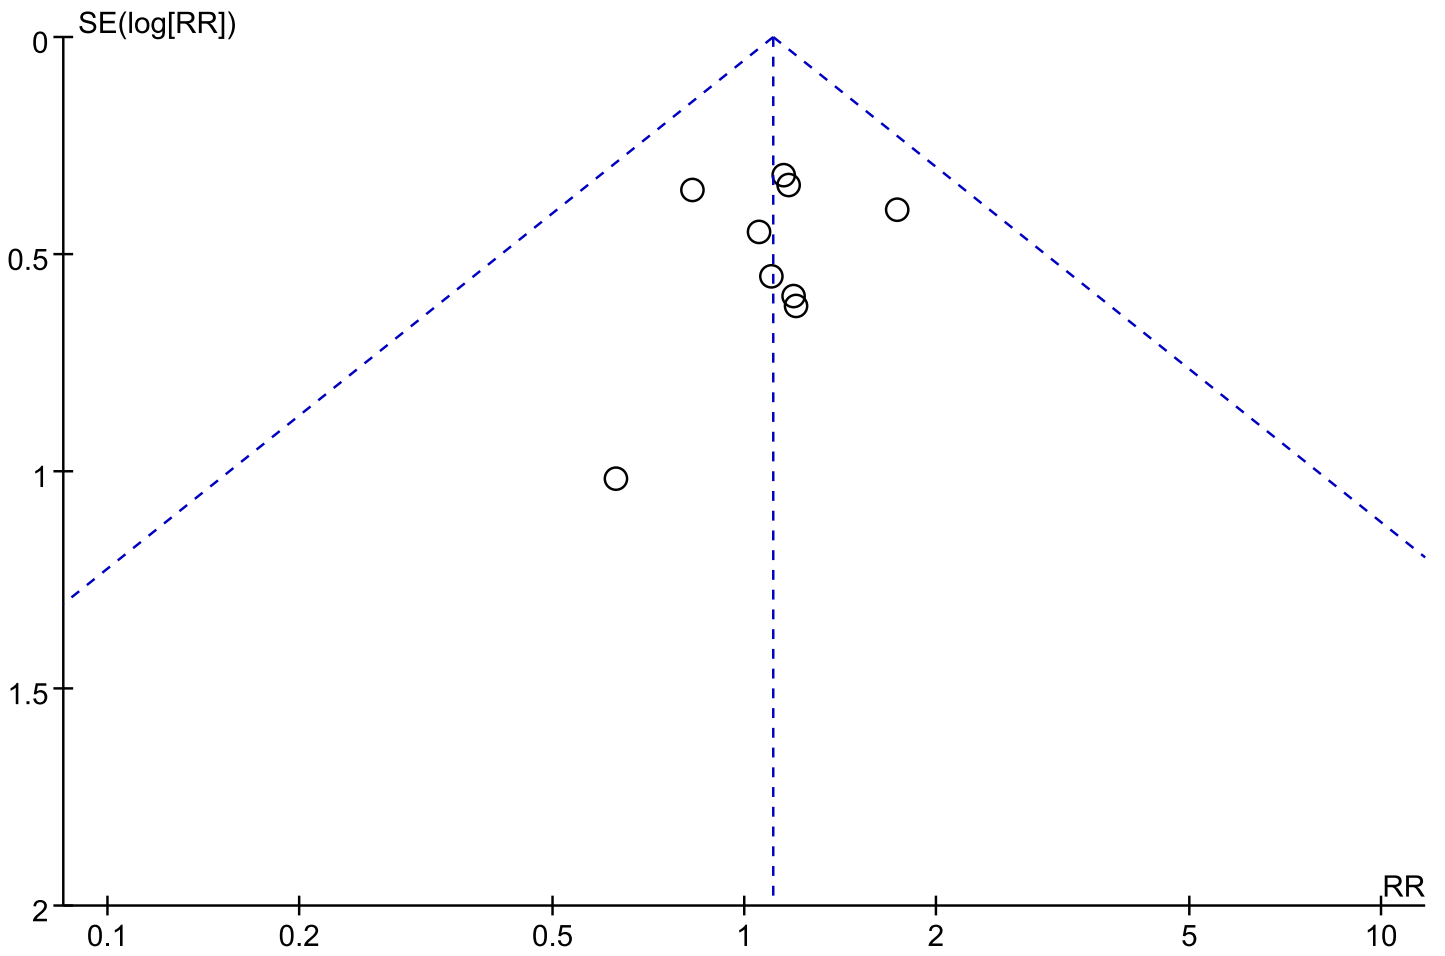

**Supplementary Figure 6.** Funnel plot of the comparison for multiple tracts.

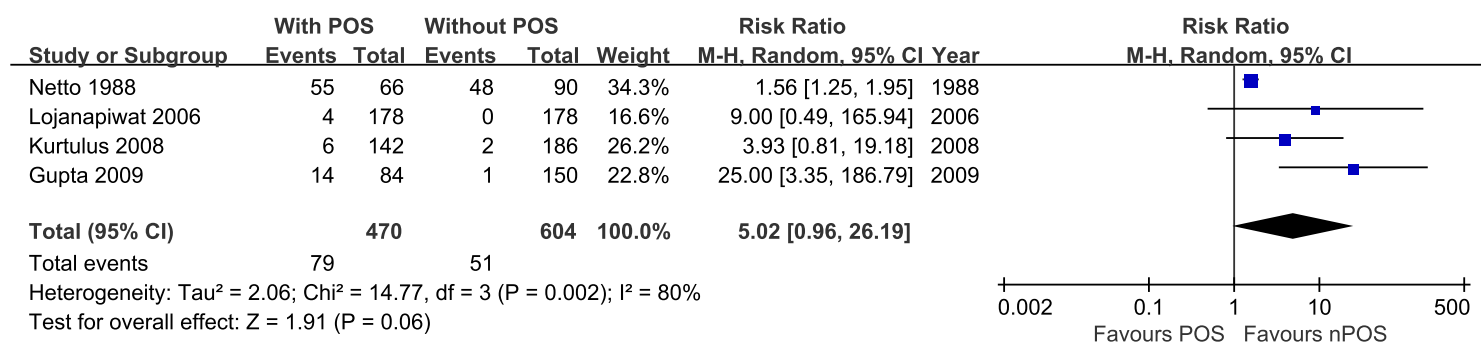

**Supplementary Figure 7.** Forest plot of the comparison for requiring metal dilator. CI, confidence interval; M-H, Mantel-Haenszel; (n)POS, (non-) previous open surgery.



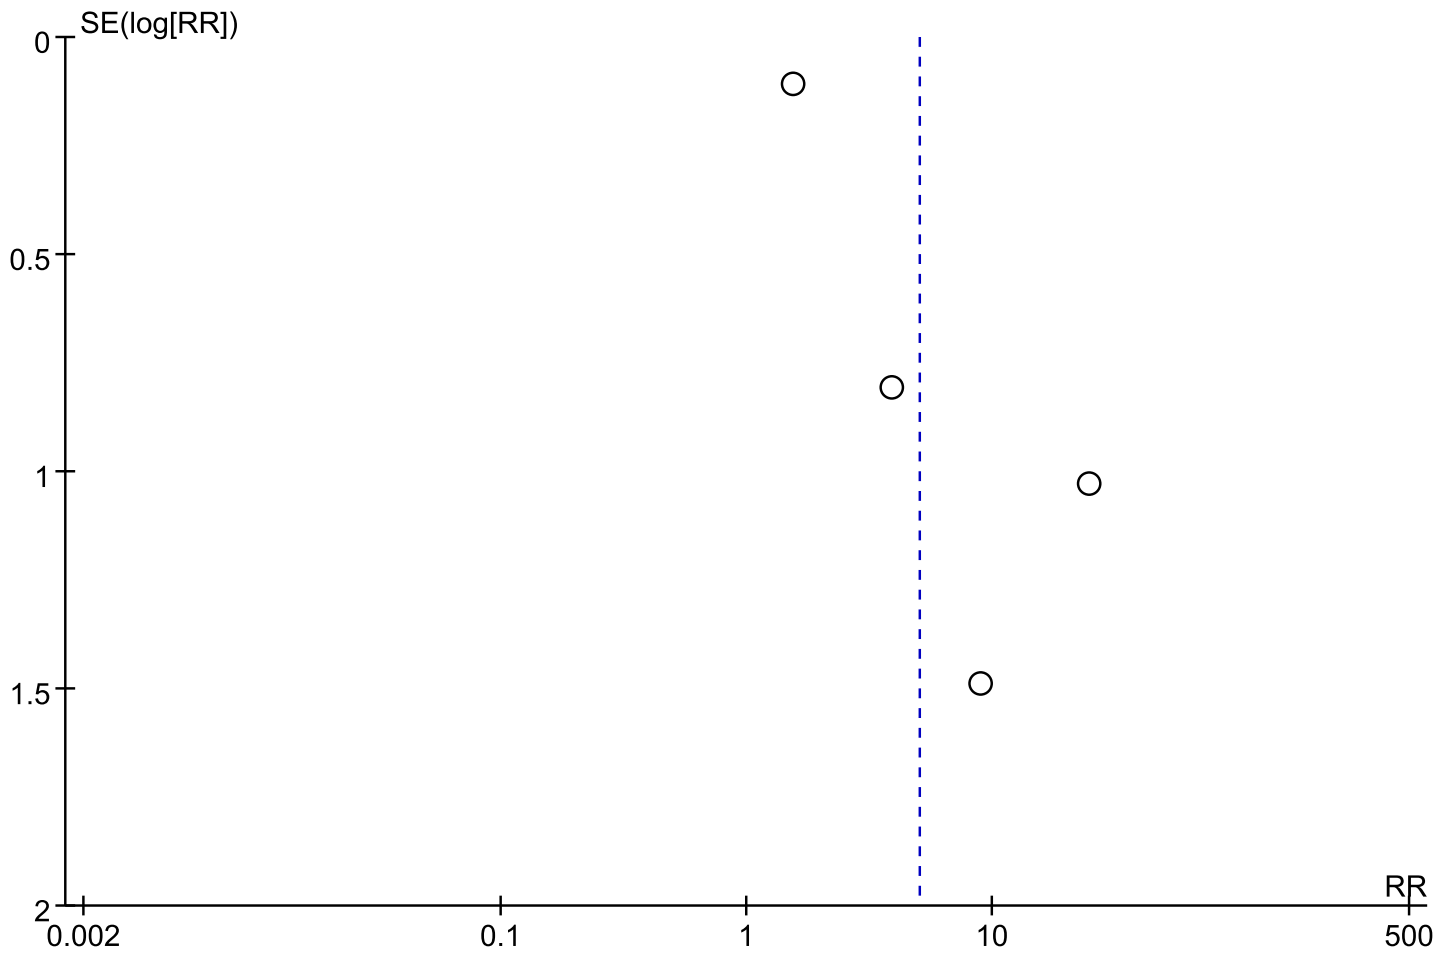

**Supplementary Figure 8.** Funnel plot of the comparison for requiring metal dilator.

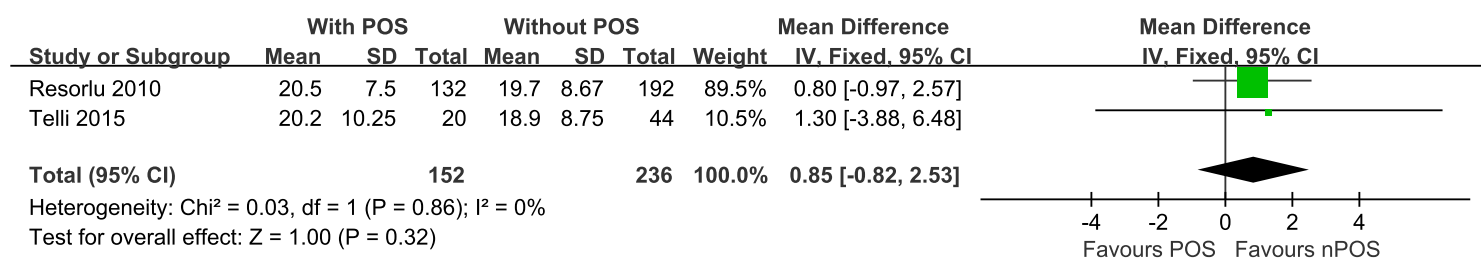

**Supplementary Figure 9.** Forest plot of the comparison for tract establishing time. CI, confidence interval; IV, inverse variance; (n)POS, (non-) previous open surgery; SD, standard deviation.

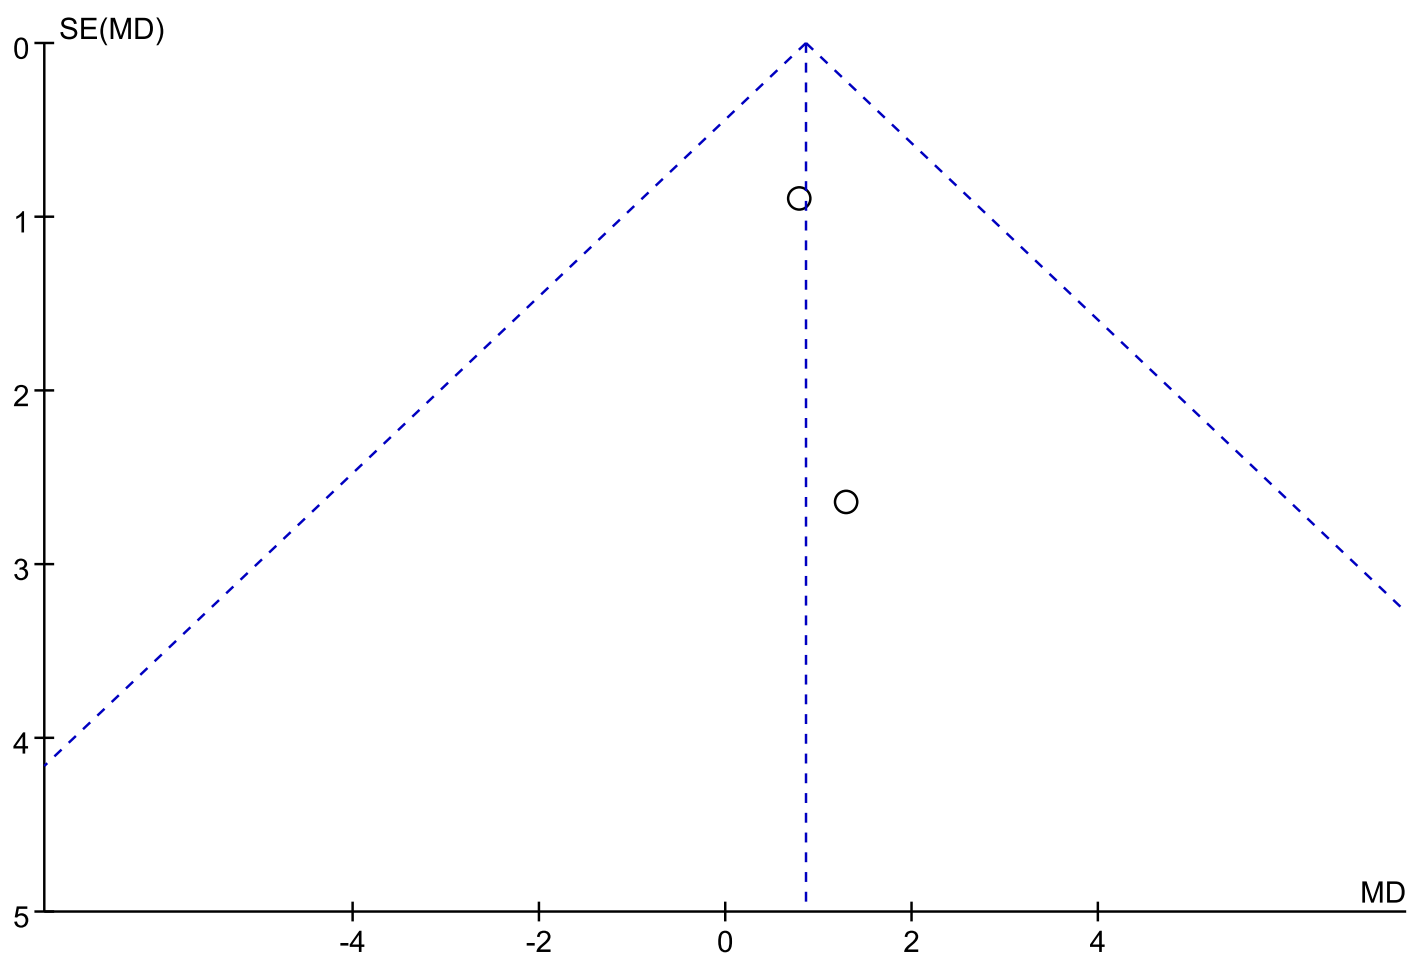

**Supplementary Figure 10.** Funnel plot of the comparison for tract establishing time.

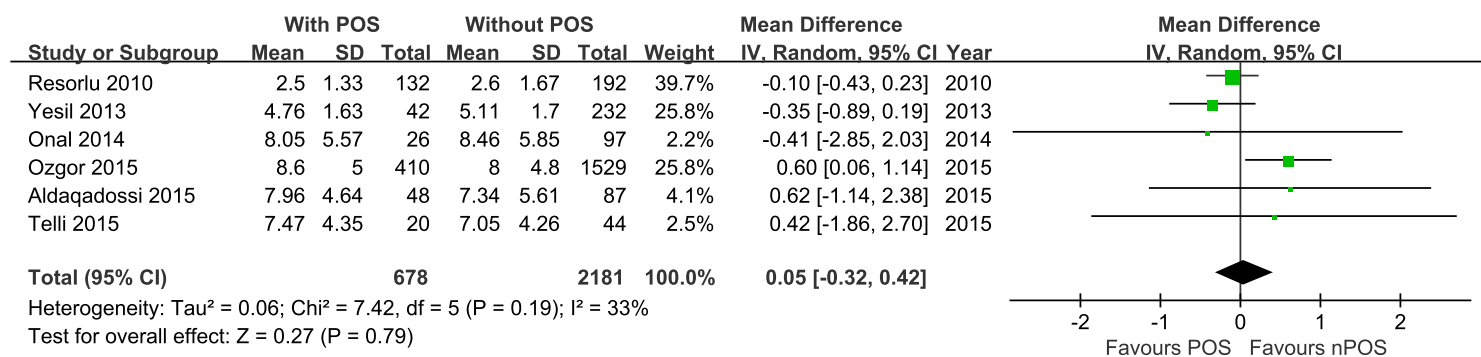

**Supplementary Figure 11.** Forest plot of the comparison for fluoroscopic time. CI, confidence interval; IV, inverse variance; (n) POS, (non-) previous open surgery; SD, standard deviation.

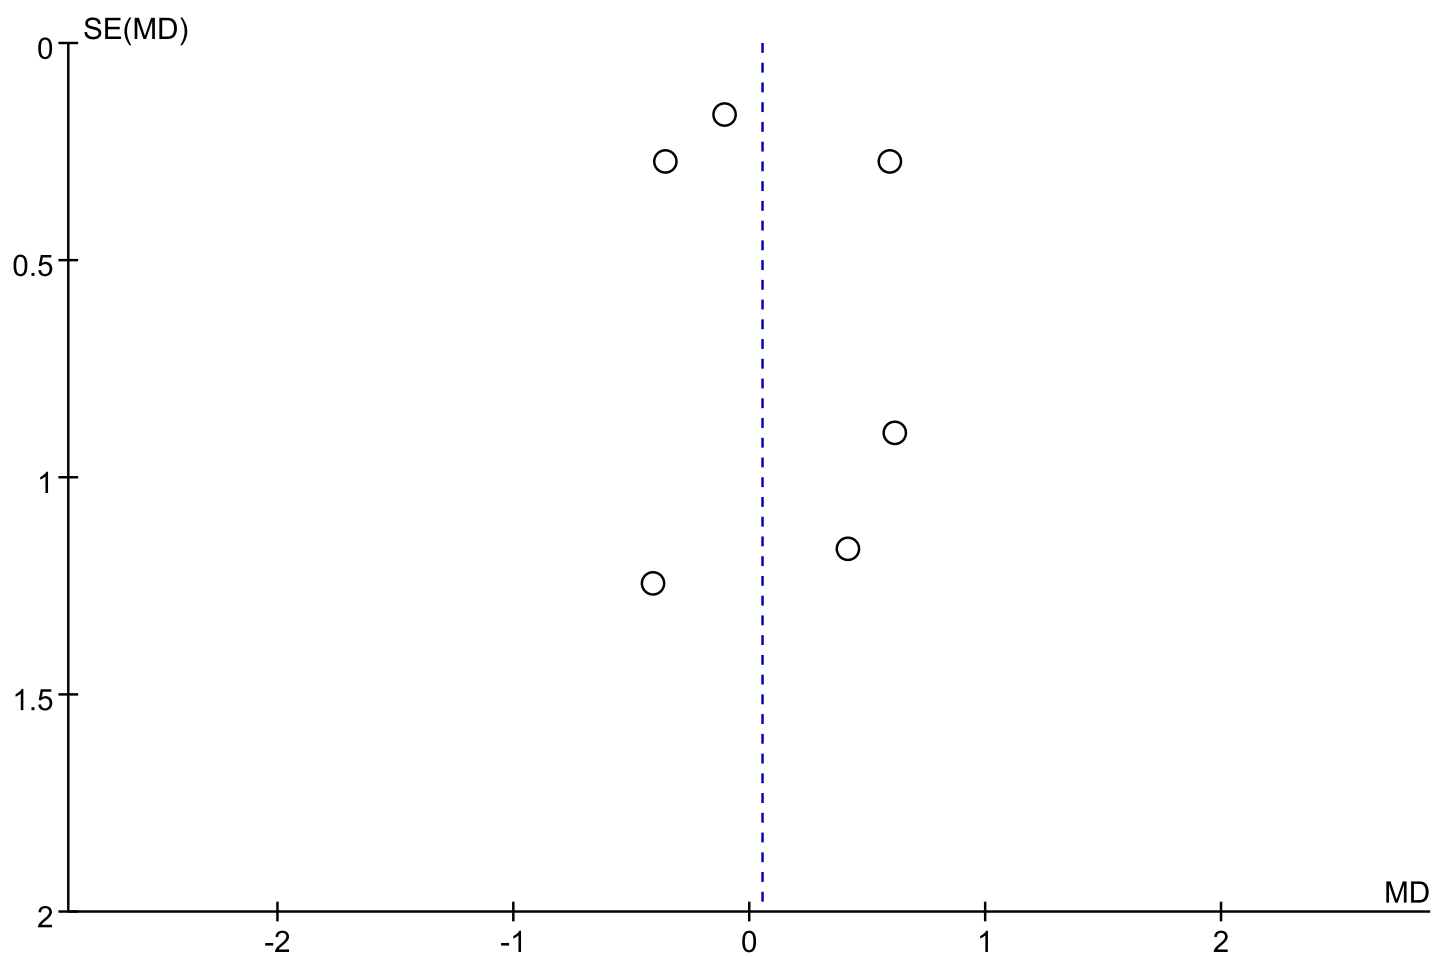

**Supplementary Figure 12.** Funnel plot of the comparison for fluoroscopic time.

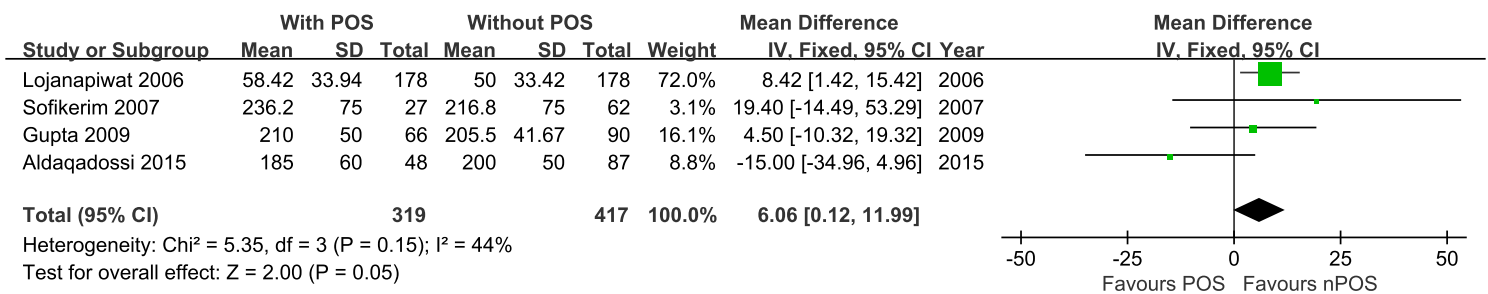

**Supplementary Figure 13.** Forest plot of the comparison for analgesic demand. CI, confidence interval; IV, inverse variance; (n)POS, (non-) previous open surgery; SD, standard deviation.

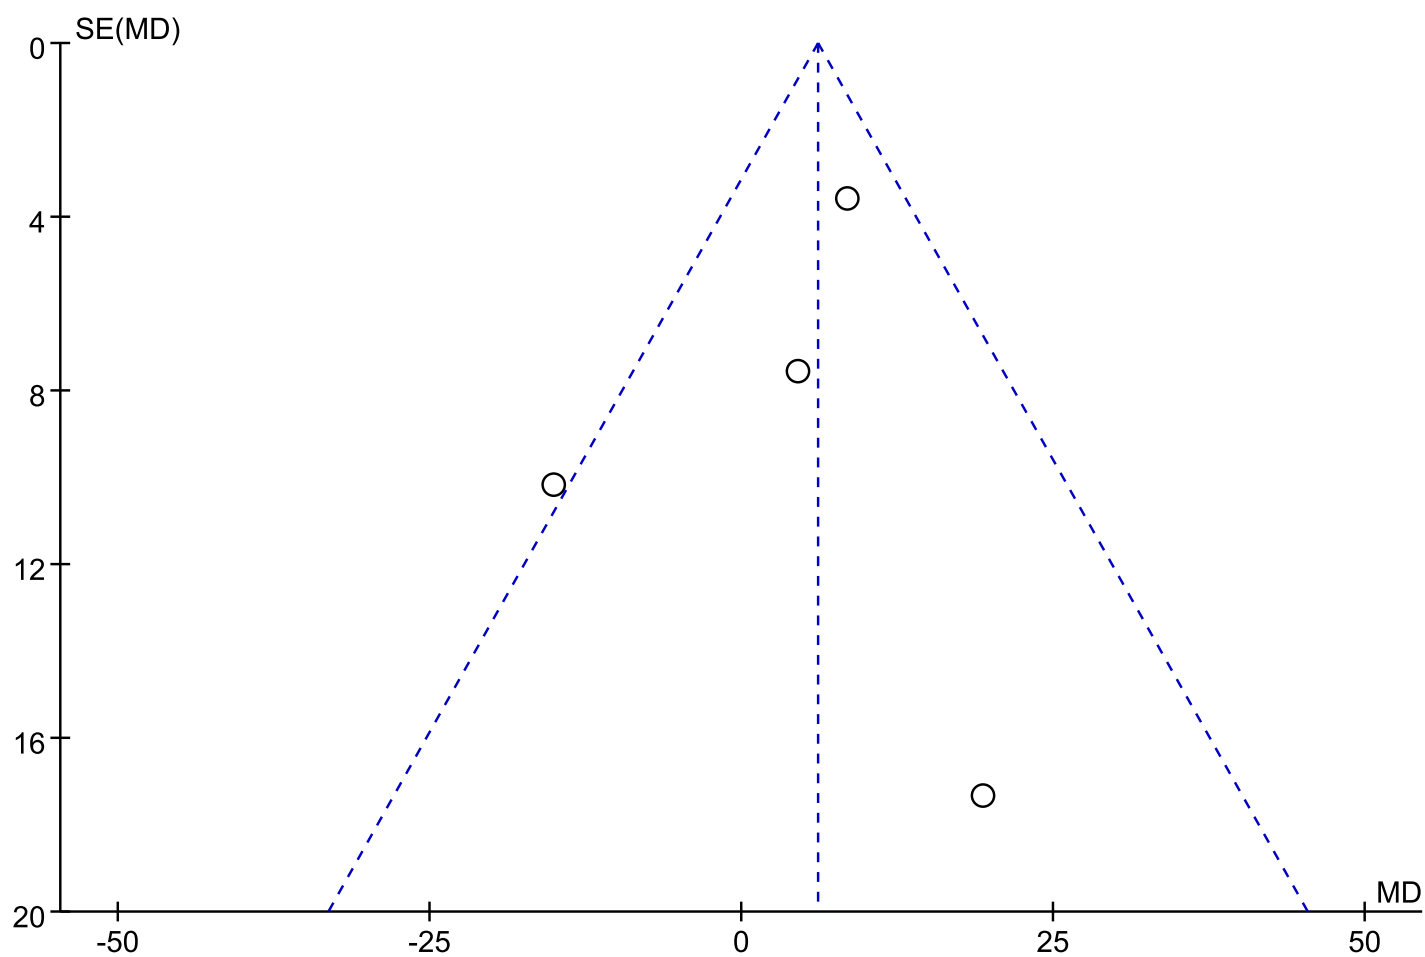

**Supplementary Figure 14.** Funnel plot of the comparison for analgesics demand.

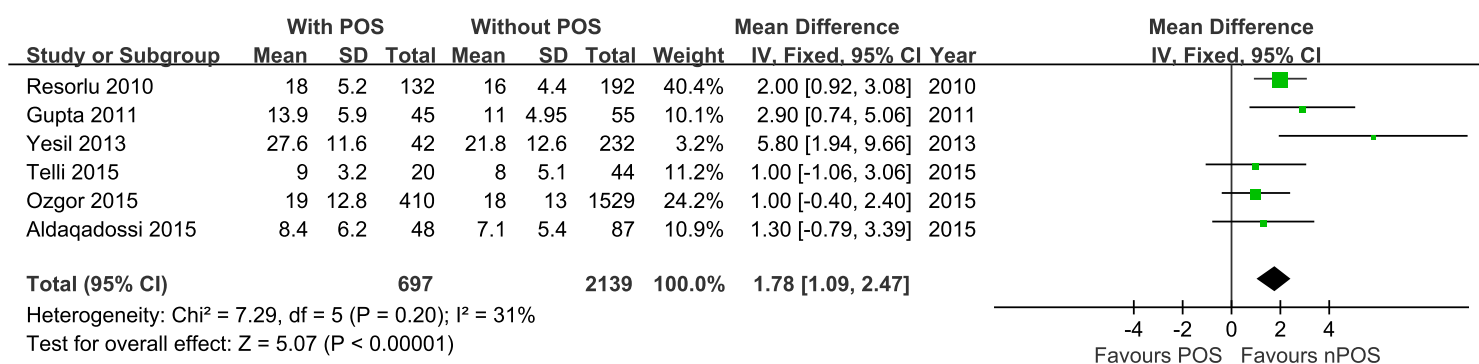

**Supplementary Figure 15.** Forest plot of the comparison for hemoglobin drop. CI, confidence interval; IV, inverse variance; (n)POS, (non-) previous open surgery; SD, standard deviation.



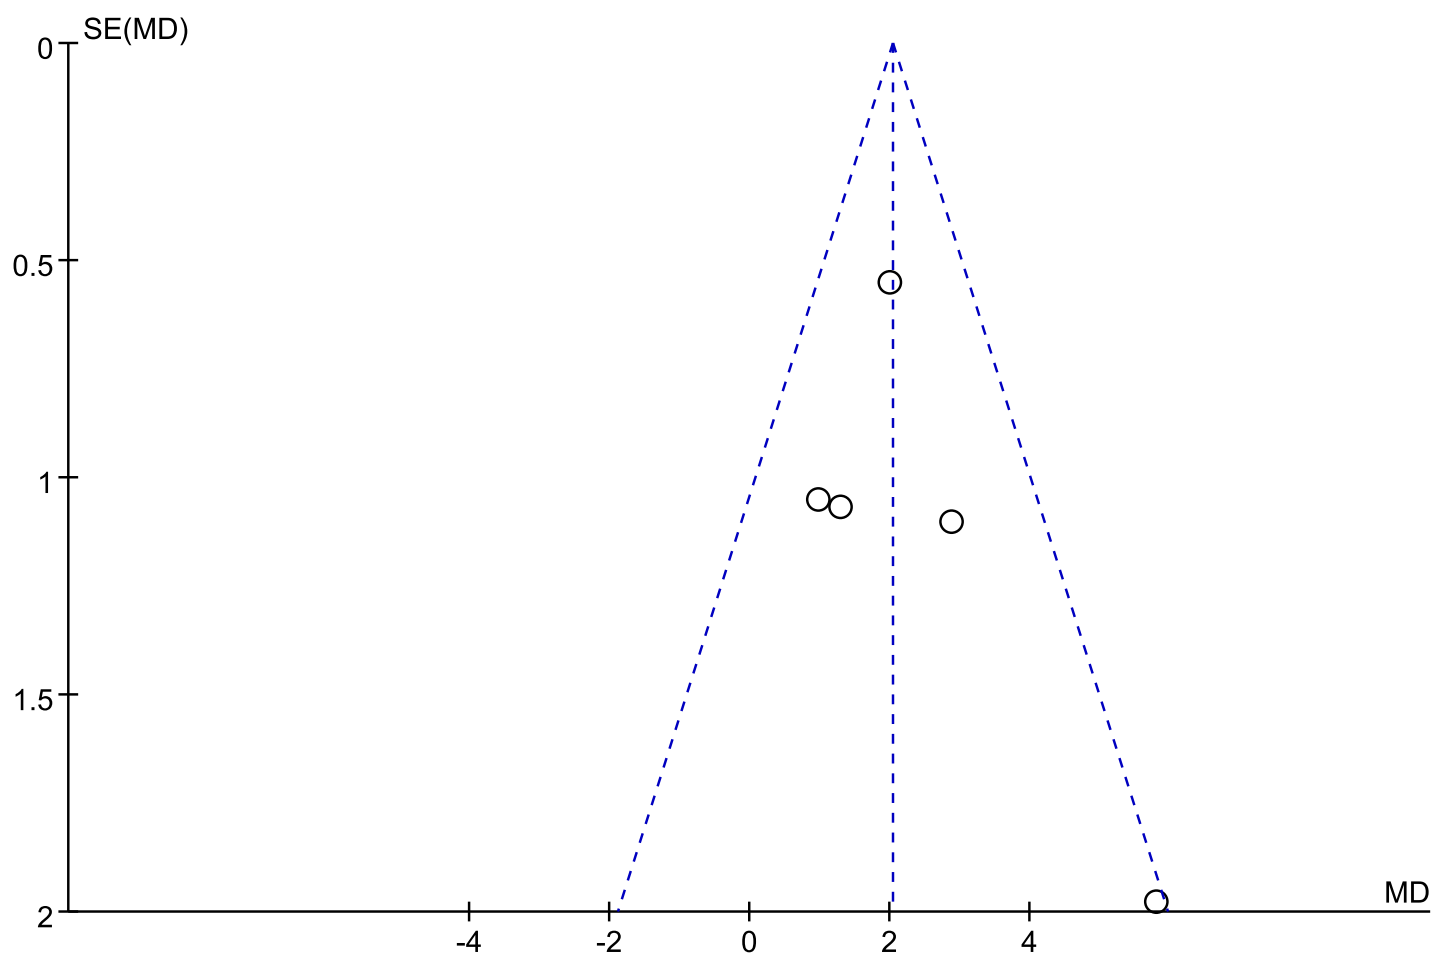

**Supplementary Figure 16.** Funnel plot of the comparison for hemoglobin drop.

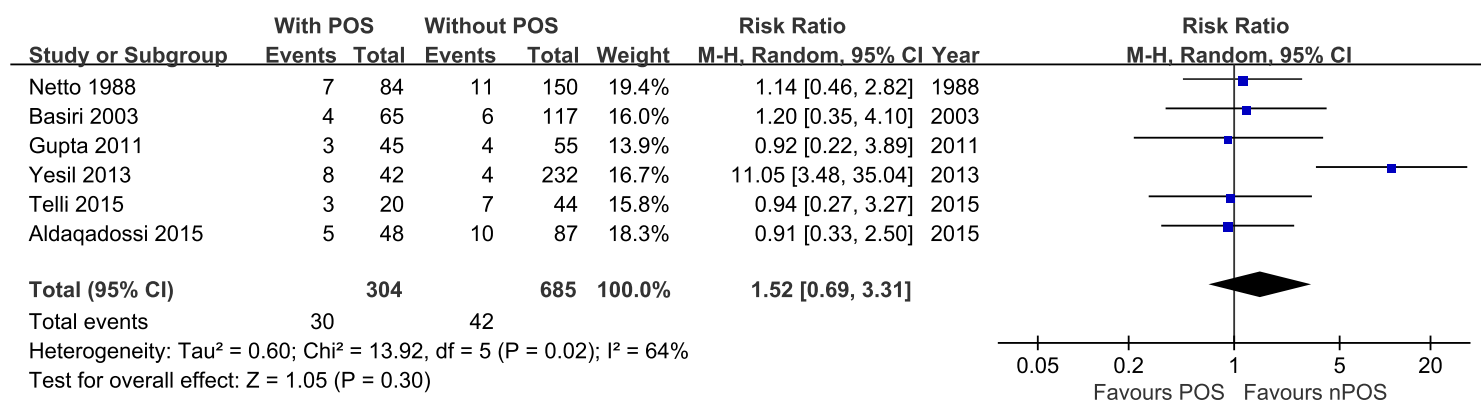

**Supplementary Figure 17.** Forest plot of the comparison for hemorrhage. CI, confidence interval; M-H, Mantel-Haenszel; (n)POS, (non-) previous open surgery.

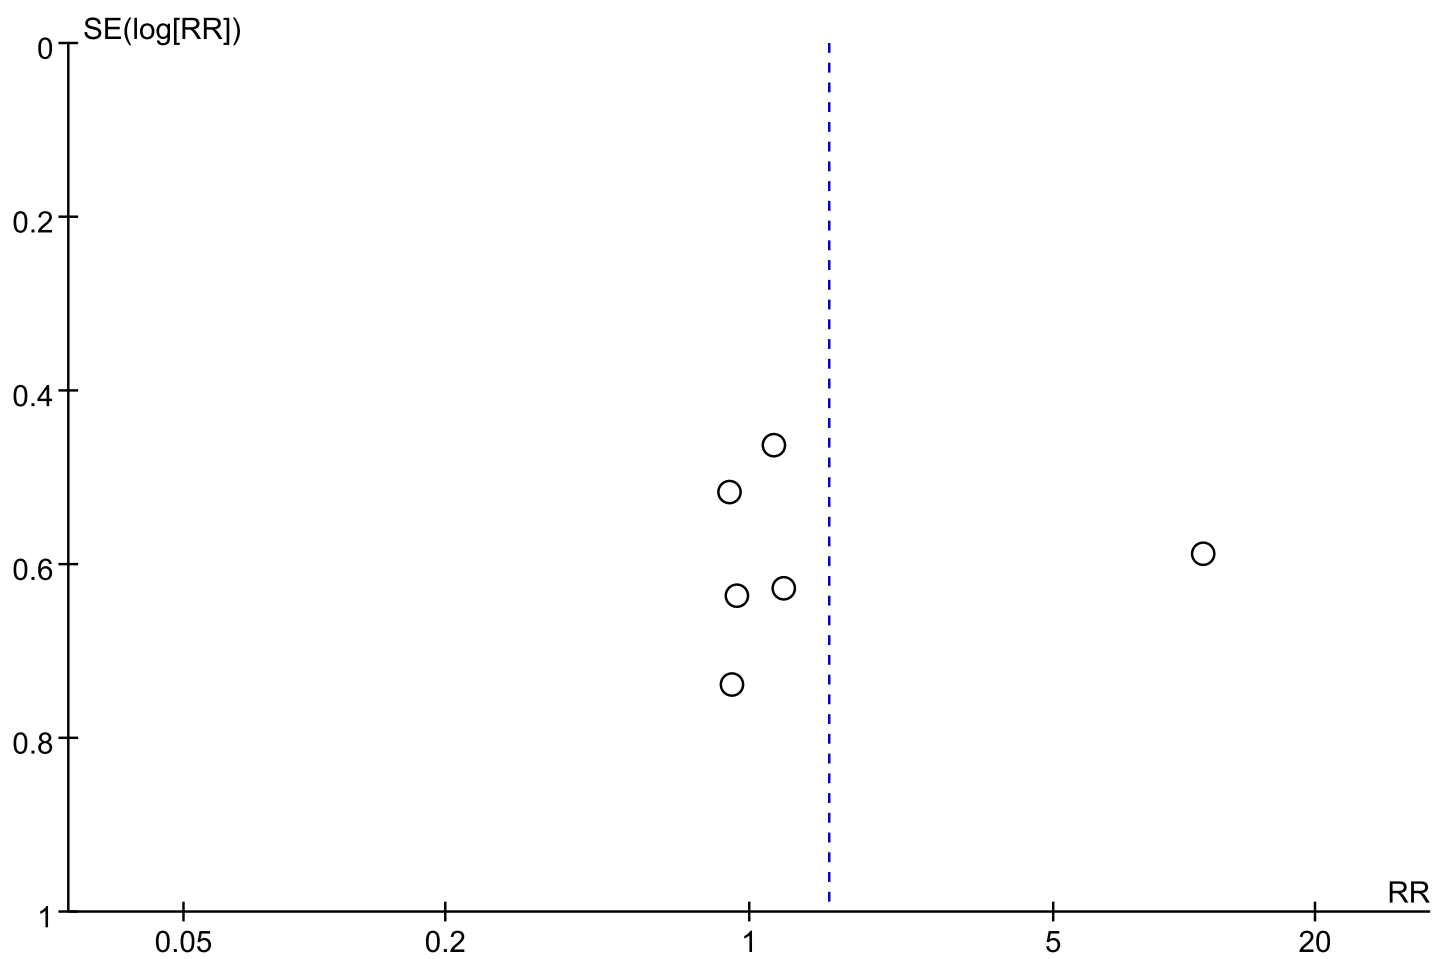

**Supplementary Figure 18.** Funnel plot of the comparison for Hemorrhage.

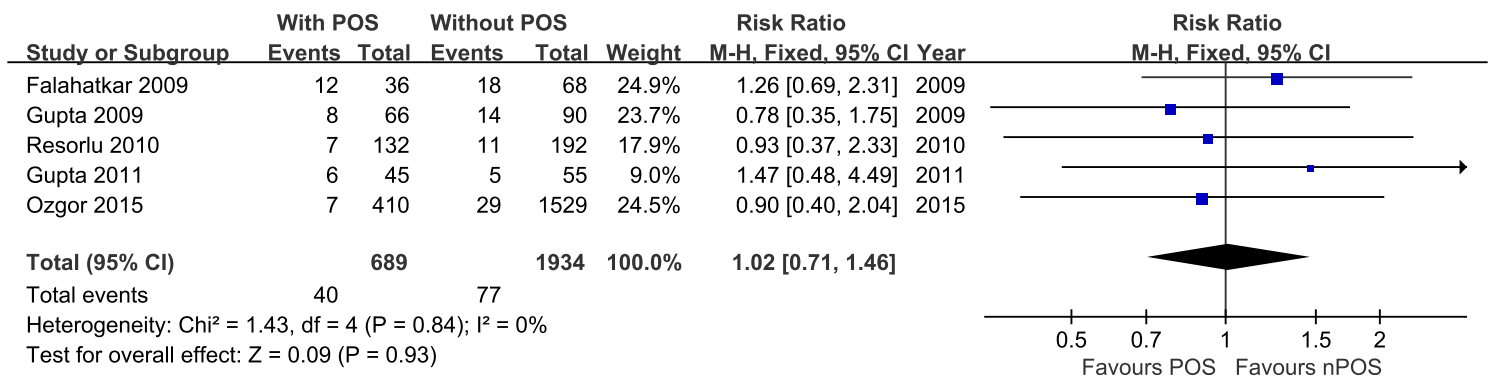

**Supplementary Figure 19.** Forest plot of the comparison for postoperative fever. CI, confidence interval; M-H, Mantel-Haenszel; (n)POS, (non-) previous open surgery.

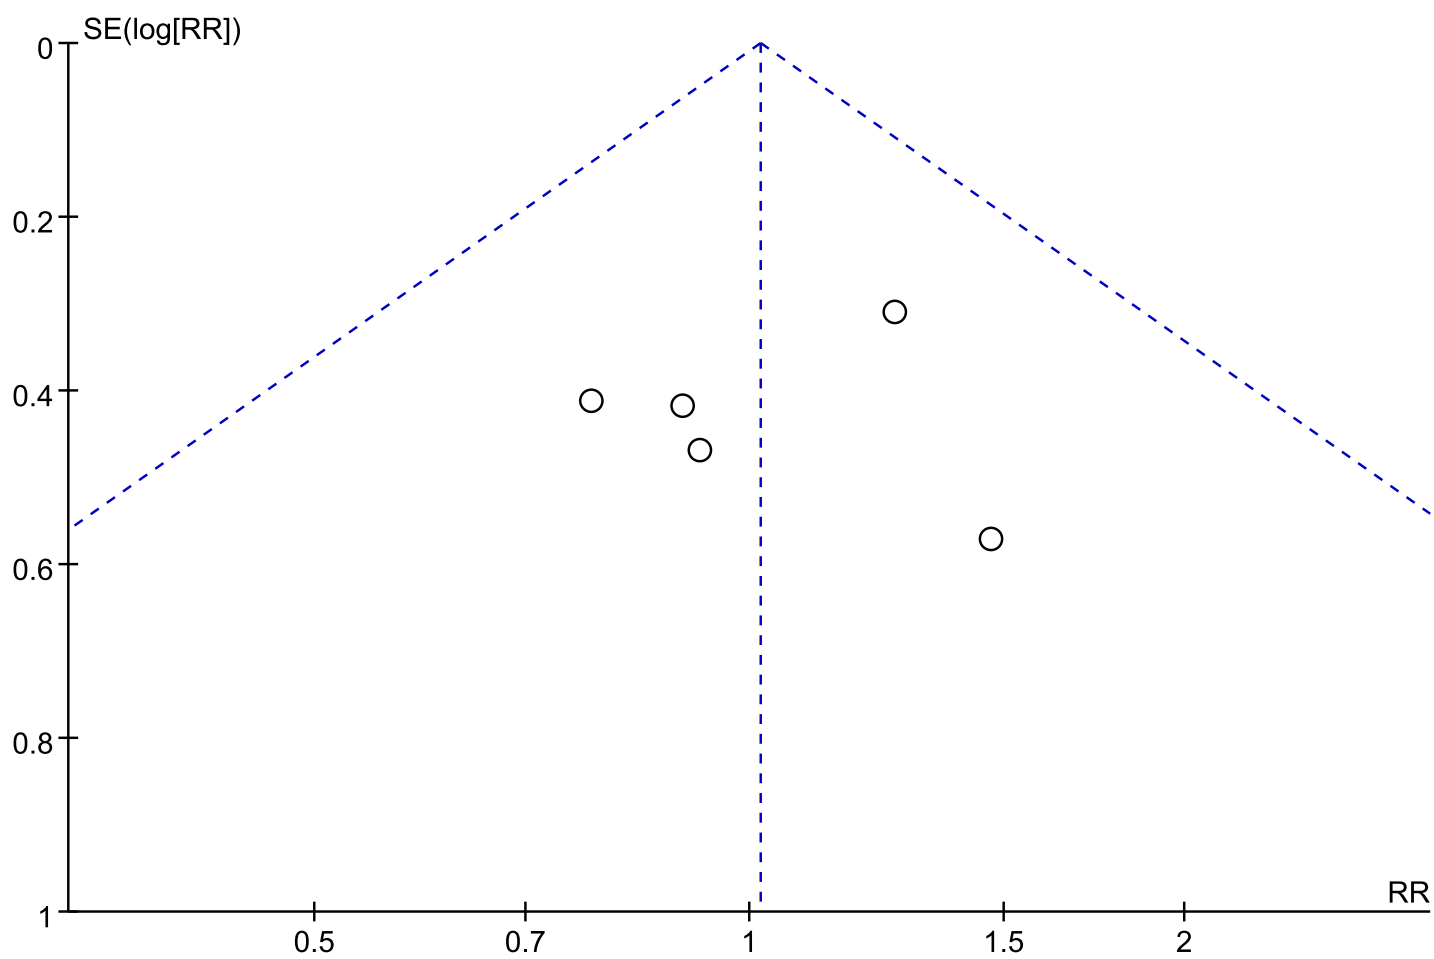

**Supplementary Figure 20.** Funnel plot of the comparison for postoperative fever.

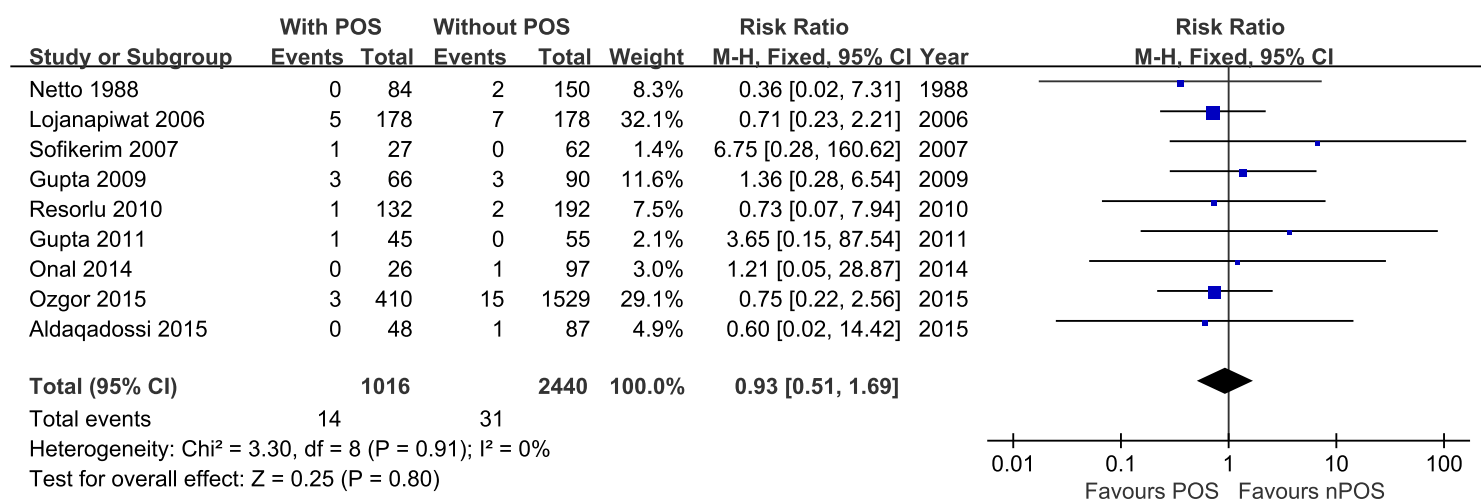

**Supplementary Figure 21.** Forest plot of the comparison for hydro-/hemo-/pneumothorax. CI, confidence interval; M-H, Mantel-Haenszel; (n)POS, (non-) previous open surgery.

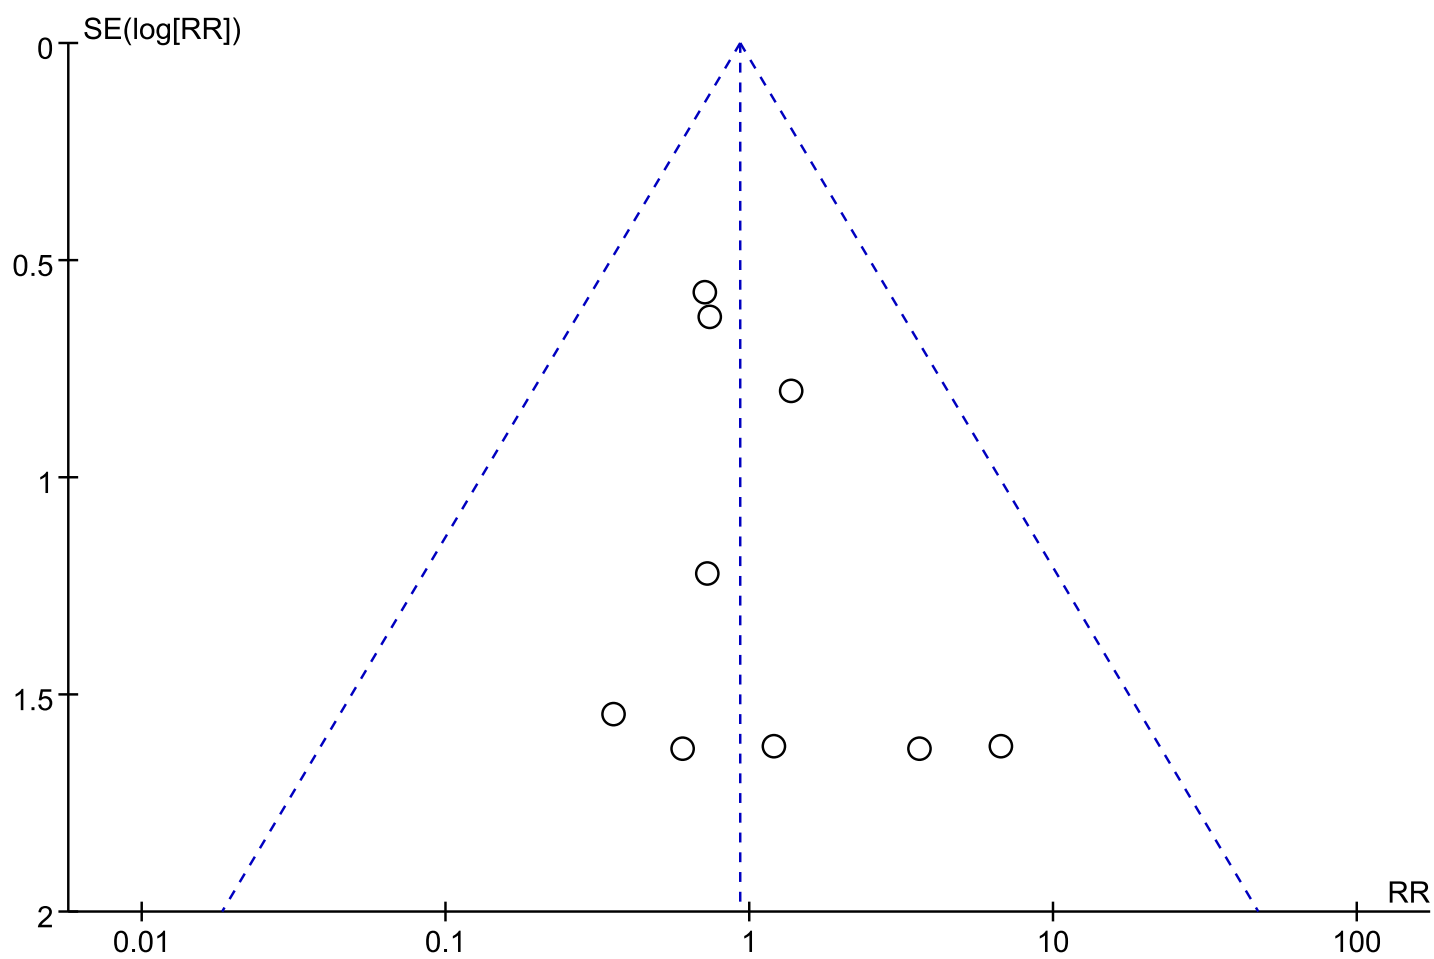

**Supplementary Figure 22.** Funnel plot of the comparison for hydro-/hemo-/pneumothorax.

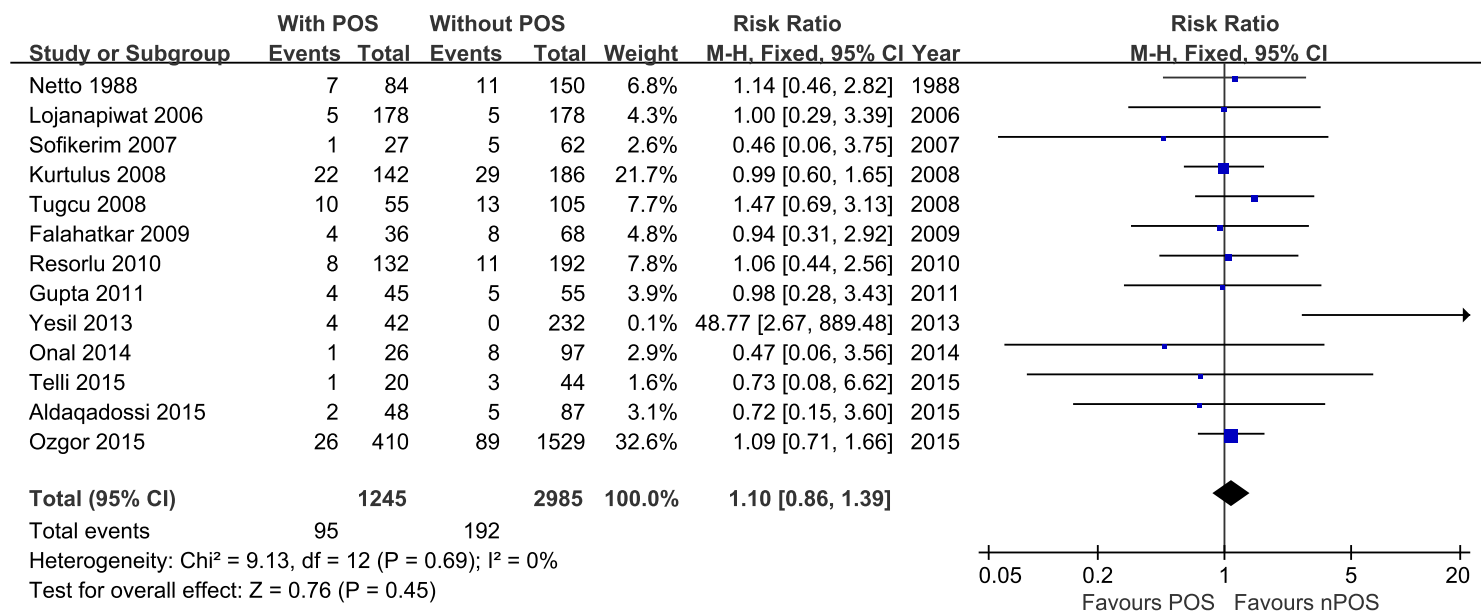

**Supplementary Figure 23.** Forest plot of the comparison for blood transfusion. CI, confidence interval; M-H, Mantel-Haenszel; (n)POS, (non-) previous open surgery.



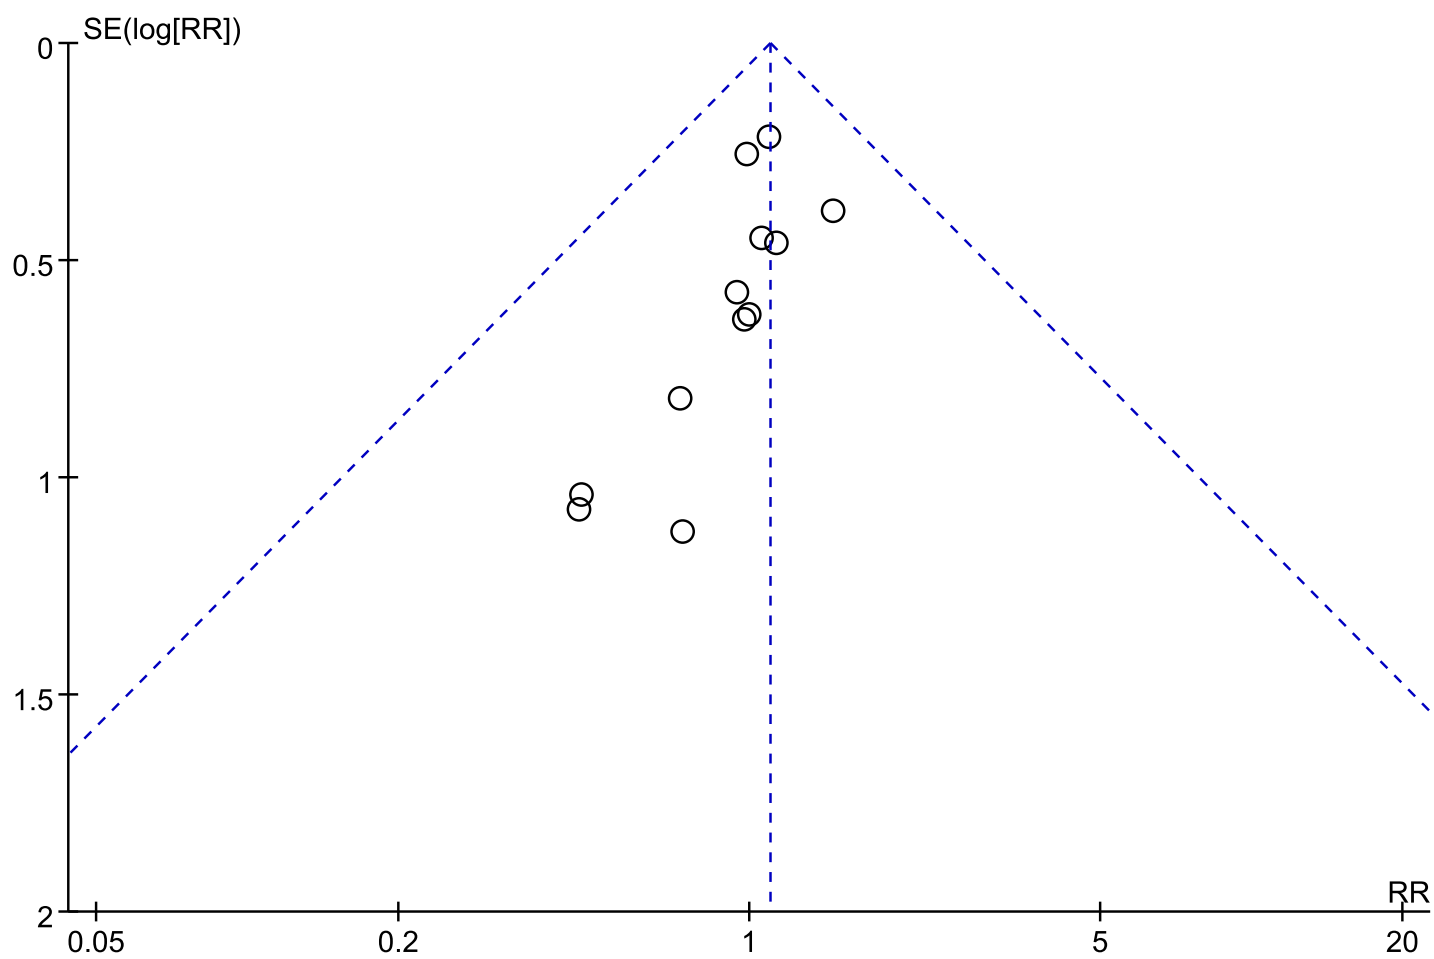

**Supplementary Figure 24.** Funnel plot of the comparison for blood transfusion.

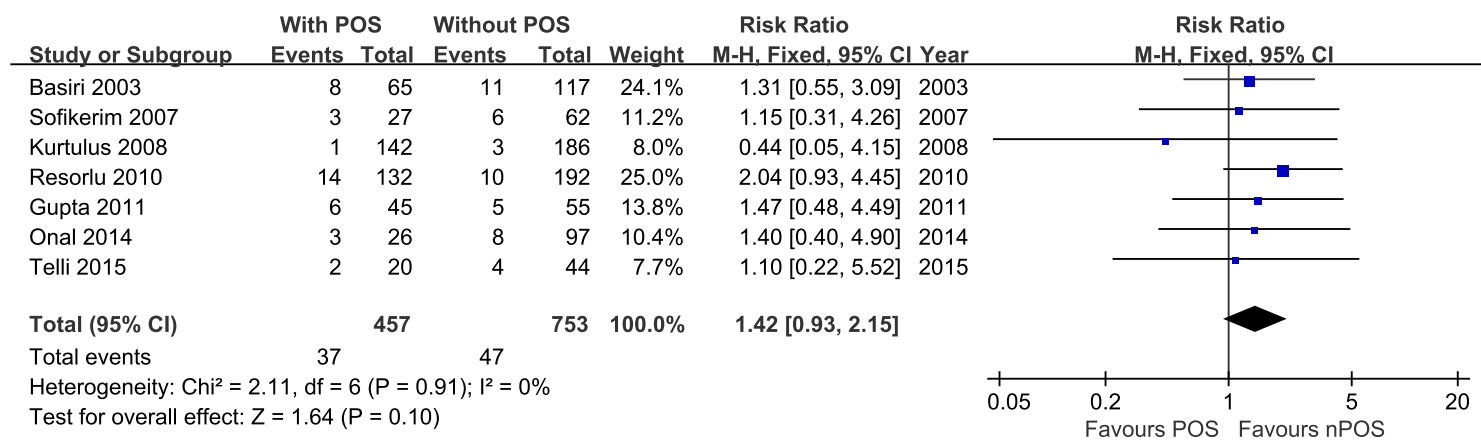

**Supplementary Figure 25.** Forest plot of the comparison for urinary tract infection. CI, confidence interval; M-H, Mantel-Haenszel; (n)POS, (non-) previous open surgery.

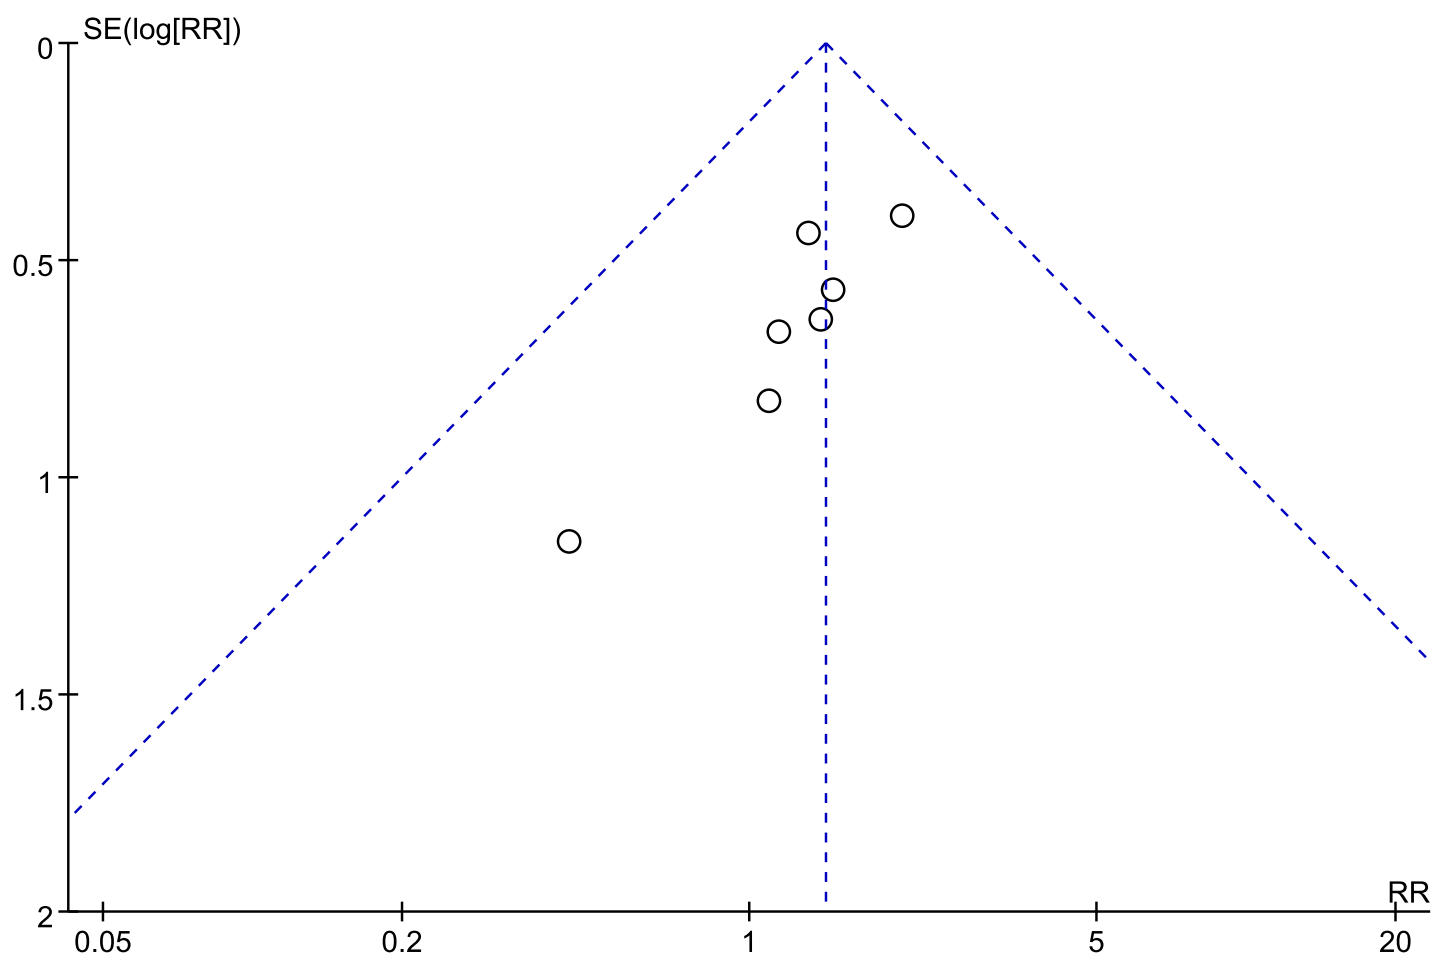

**Supplementary Figure 26.** Funnel plot of the comparison for urinary tract infection.

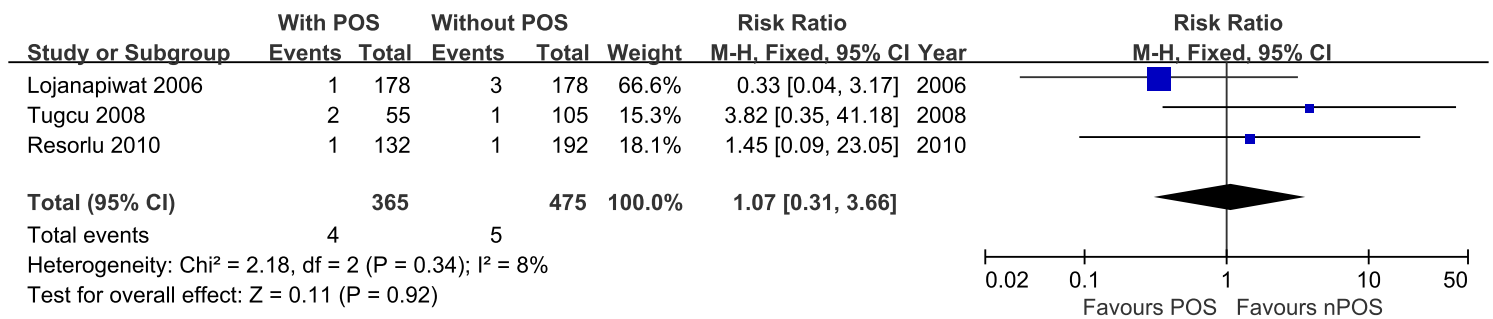

**Supplementary Figure 27.** Forest plot of the comparison for sepsis. CI, confidence interval; M-H, Mantel-Haenszel; (n)POS, (non-) previous open surgery.

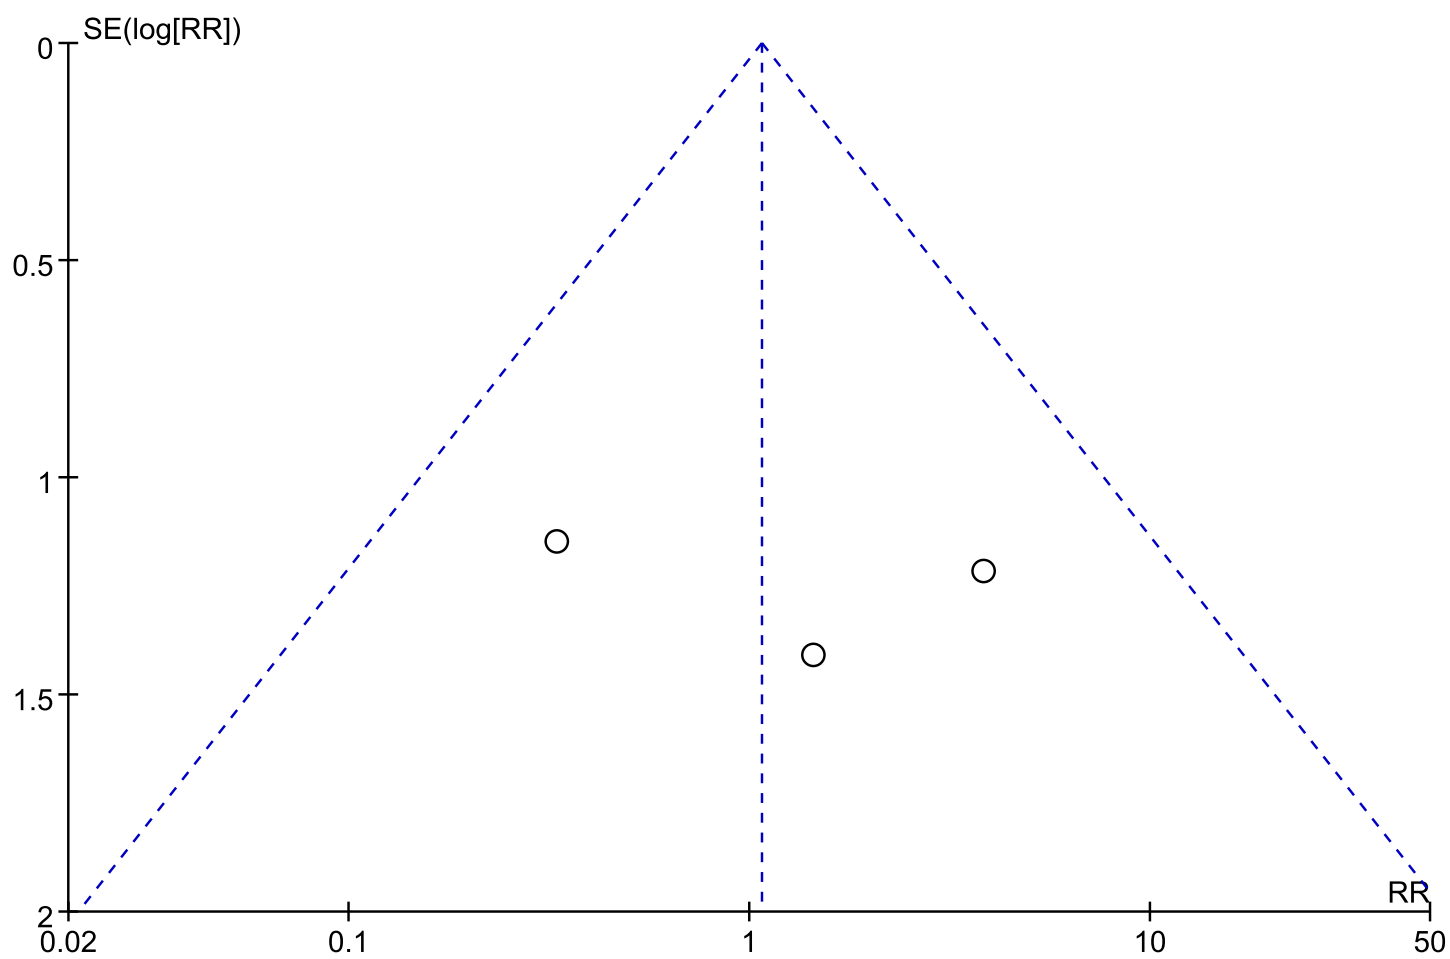

**Supplementary Figure 28.** Funnel plot of the comparison for sepsis.

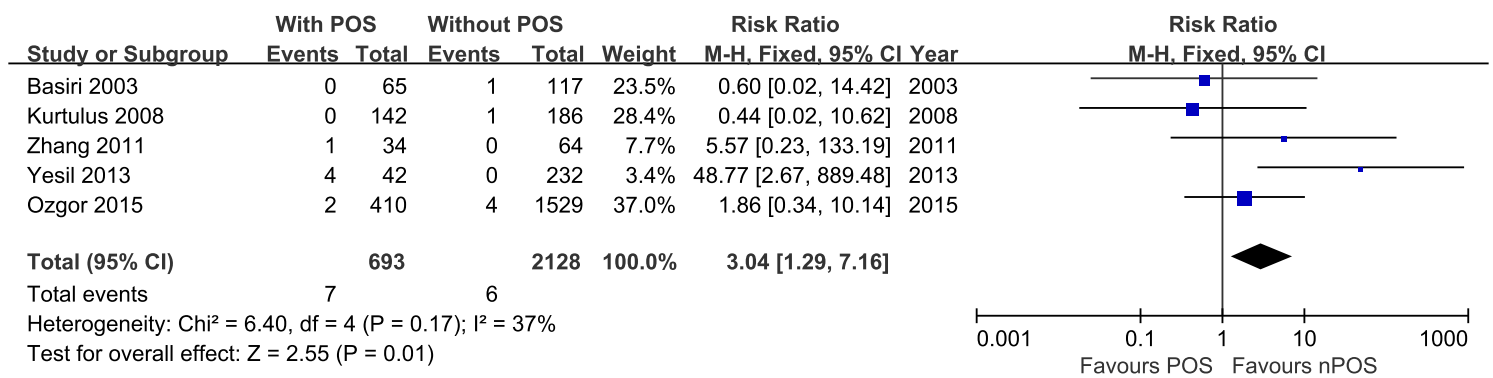

**Supplementary Figure 29.** Forest plot of the comparison for hemorrhage requiring angiographic embolization. CI, confidence interval; M-H, Mantel-Haenszel; (n)POS, (non-) previous open surgery.

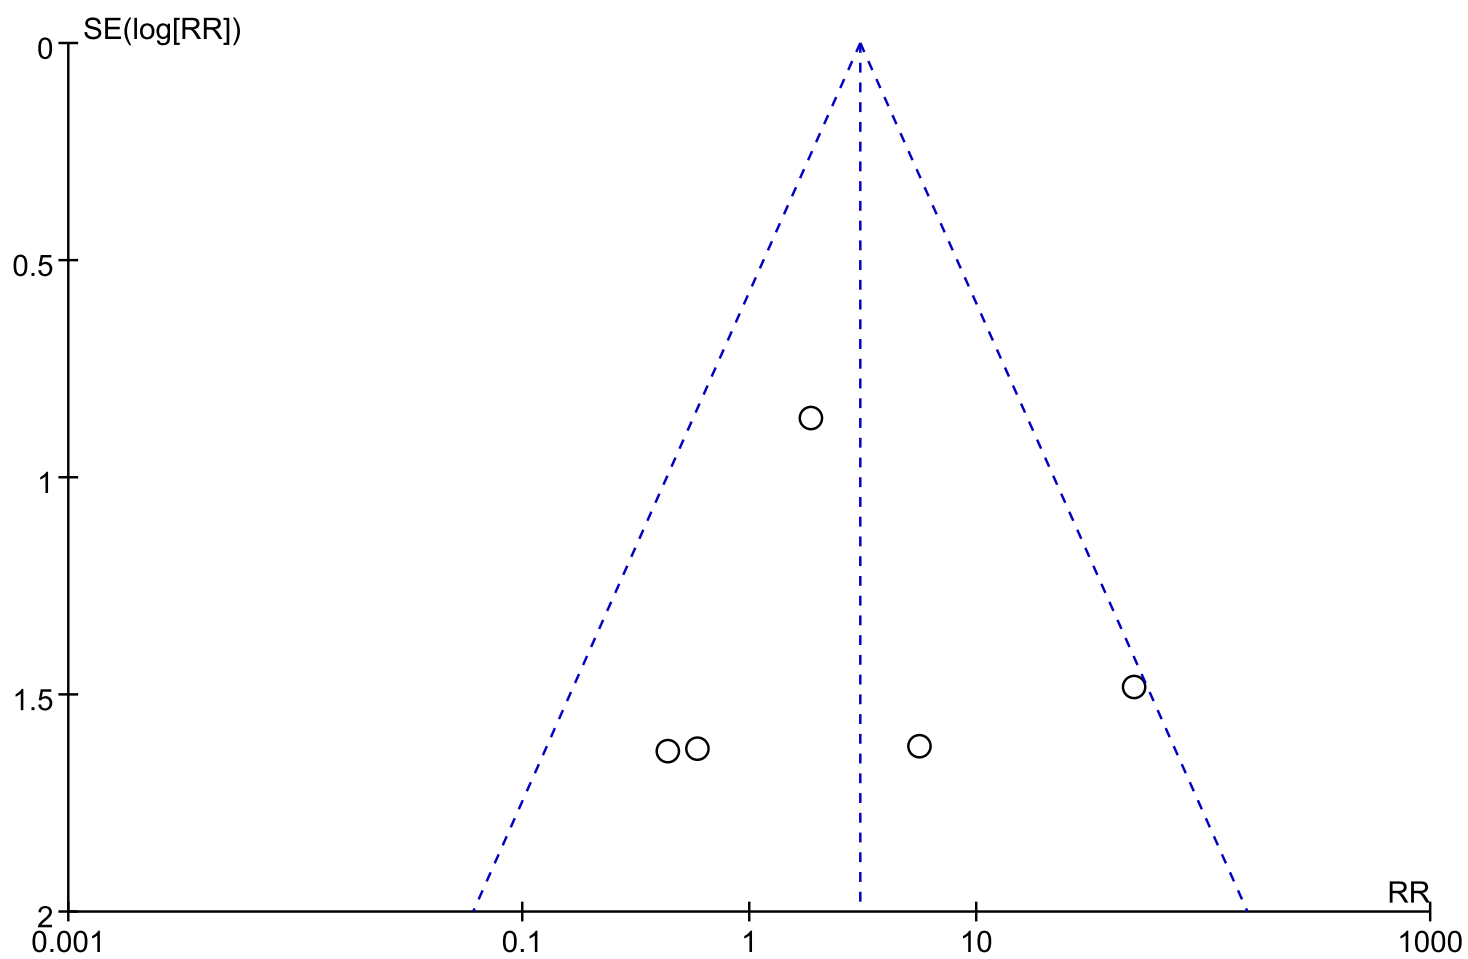

**Supplementary Figure 30.** Funnel plot of the comparison for hemorrhage requiring angiographic embolization.

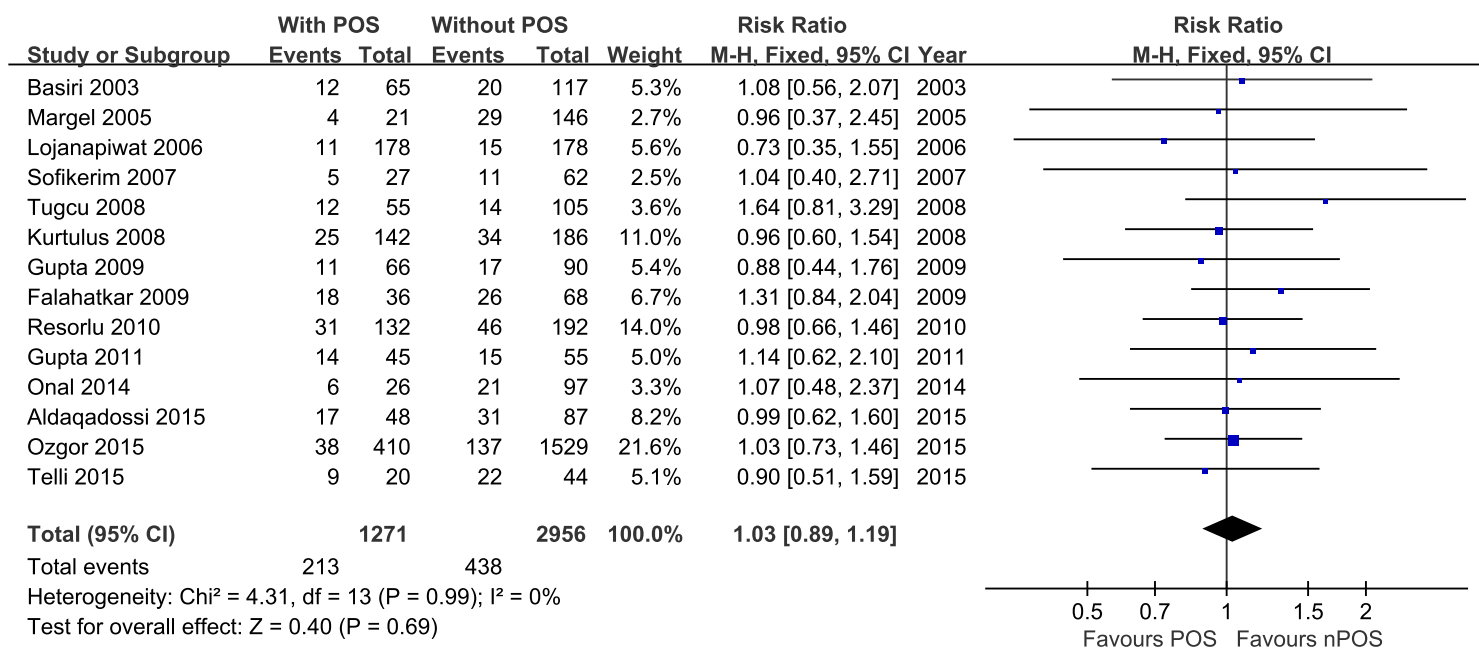

**Supplementary Figure 31.** Forest plot of the comparison for total complications. CI, confidence interval; M-H, Mantel-Haenszel; (n)POS, (non-) previous open surgery.



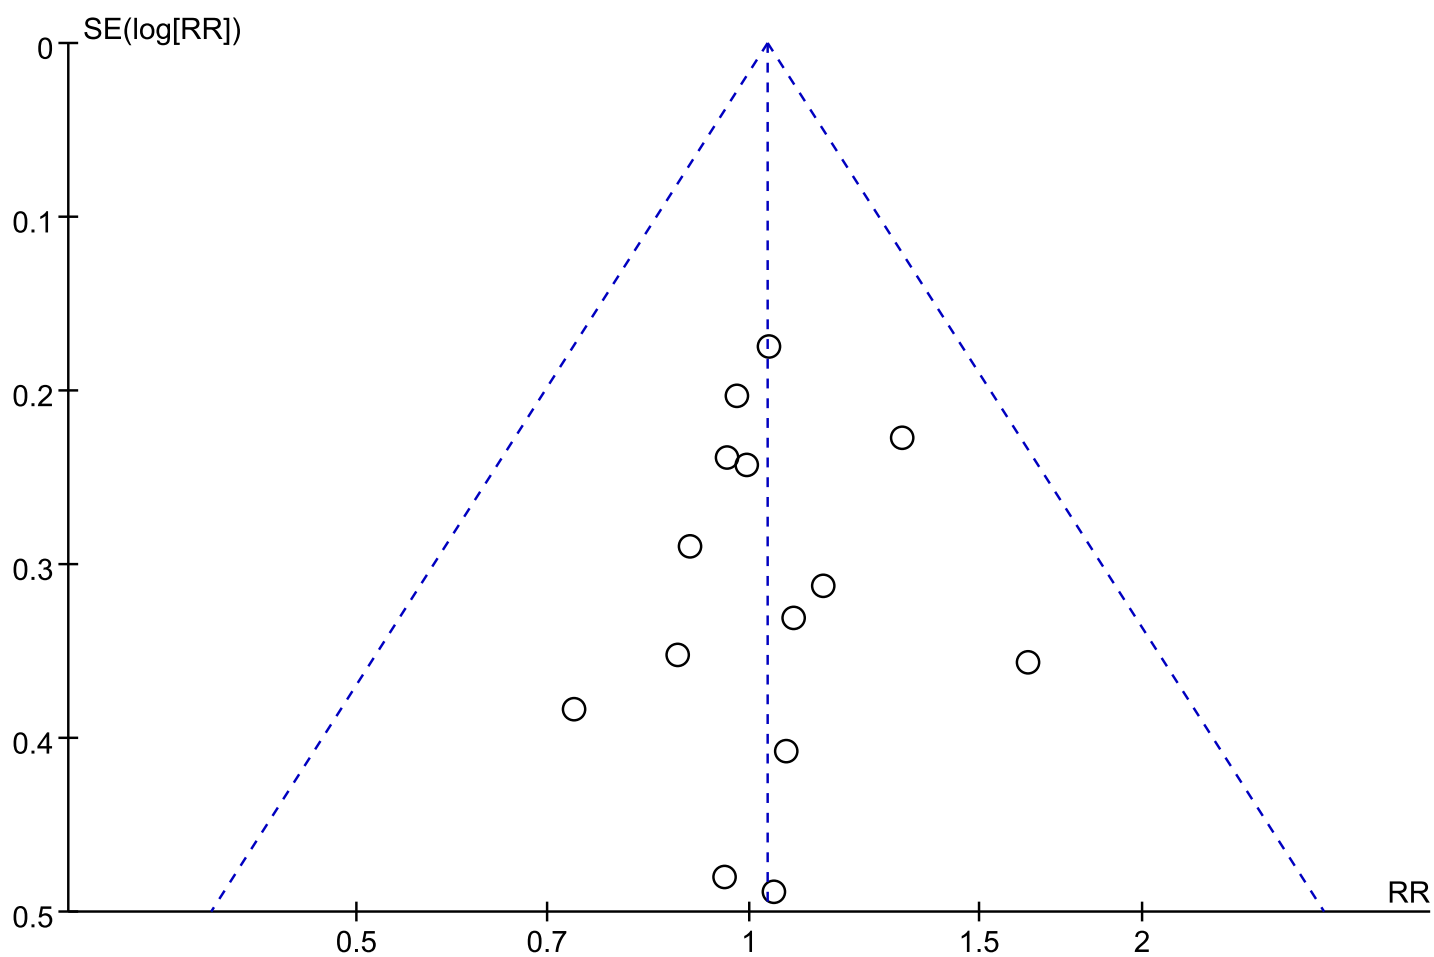

**Supplementary Figure 32.** Funnel plot of the comparison for total complication.

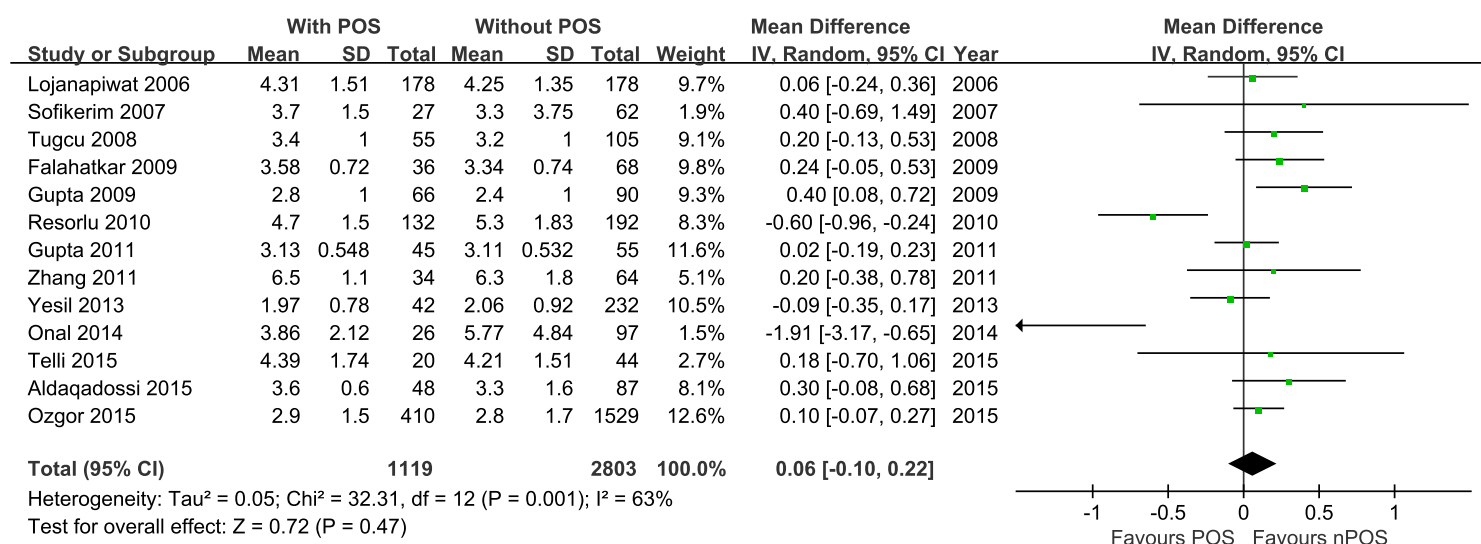

**Supplementary Figure 33.** Forest plot of the comparison for hospital stay (days). CI, confidence interval; IV, inverse variance; (n)POS, (non-) previous open surgery; SD, standard deviation.

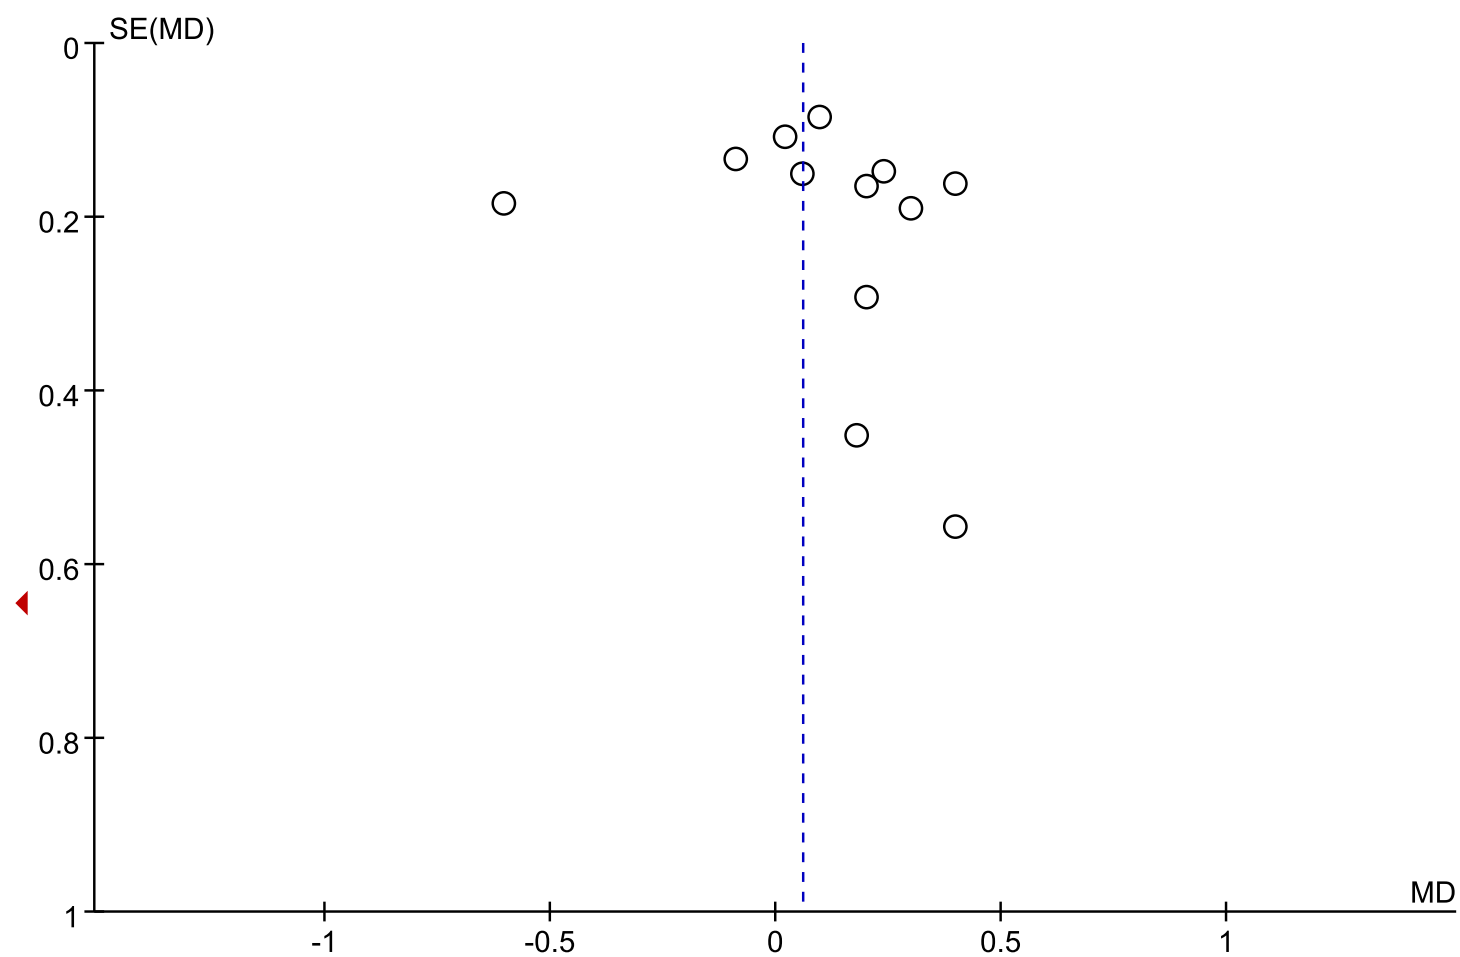

**Supplementary Figure 34.** Funnel plot of the comparison for hospital stay.

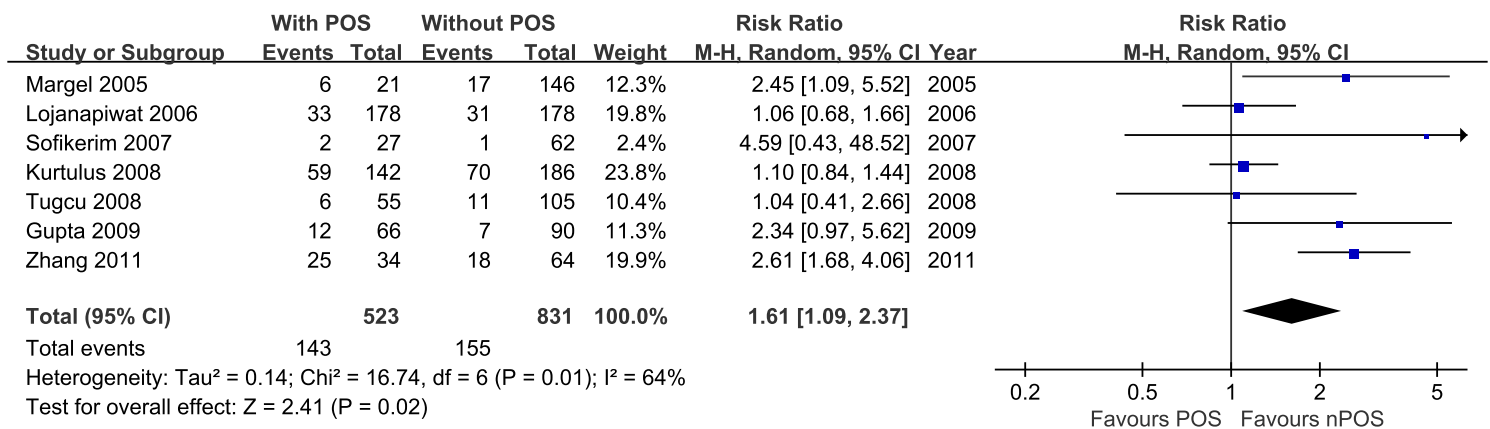

**Supplementary Figure 35.** Forest plot of the comparison for secondary treatment. CI, confidence interval; M-H, Mantel-Haenszel; (n)POS, (non-) previous open surgery.

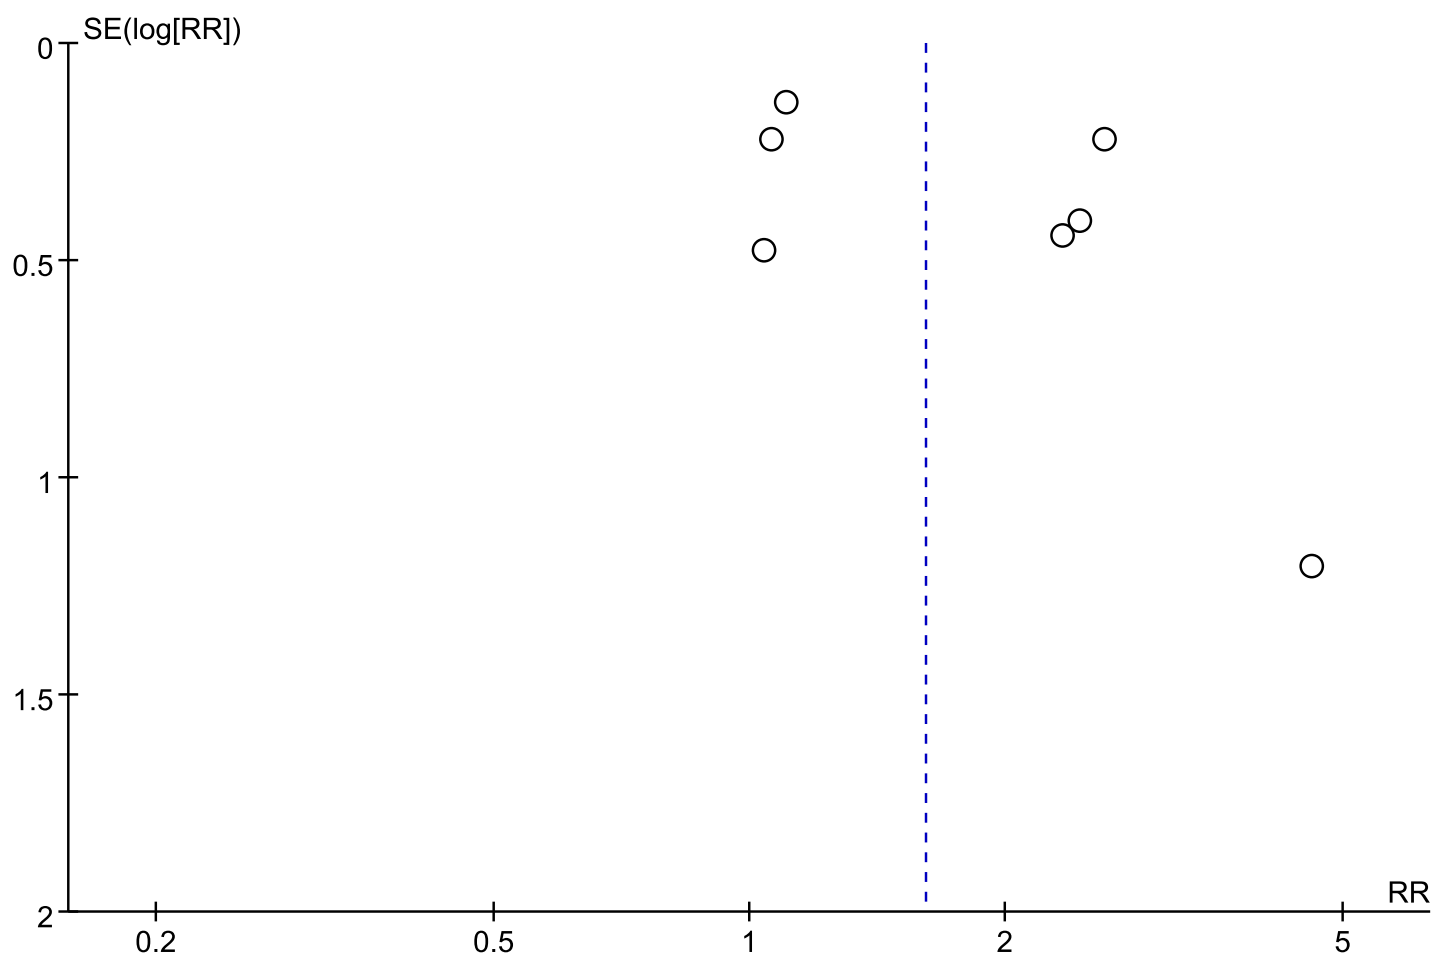

**Supplementary Figure 36.** Funnel plot of the comparison for secondary treatment.

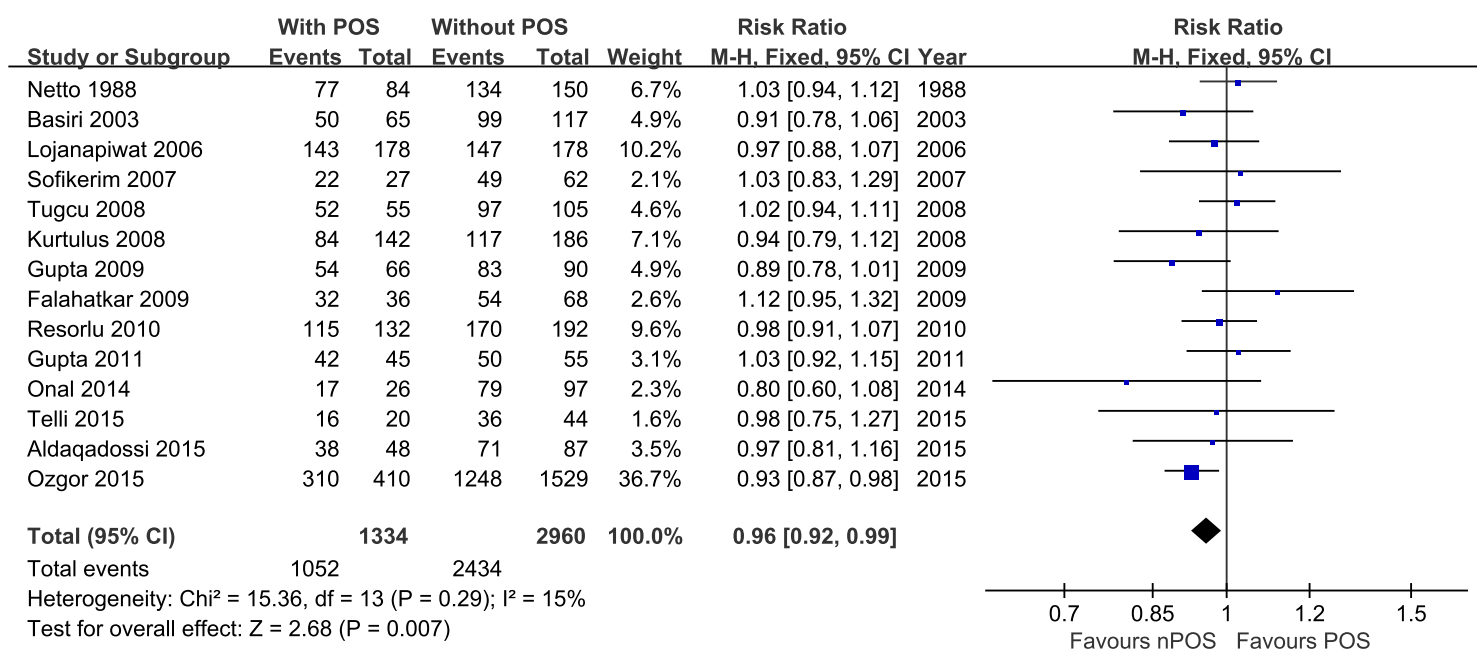

**Supplementary Figure 37.** Forest plot of the comparison for initial stone-free rate. CI, confidence interval; M-H, Mantel-Haenszel; (n)POS, (non-) previous open surgery.

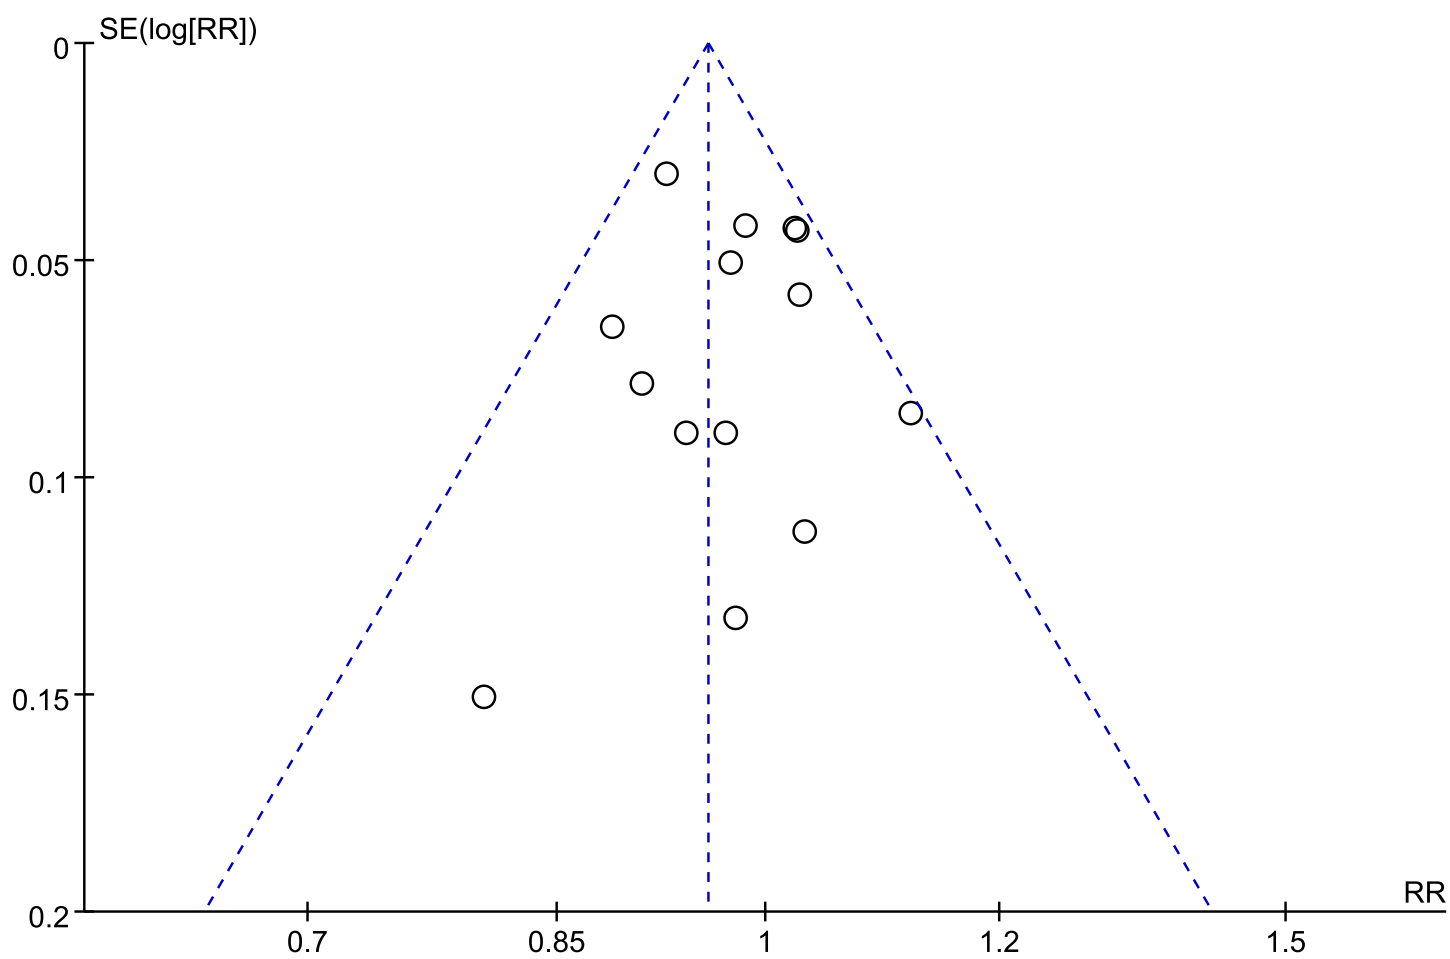

**Supplementary Figure 38.** Funnel plot of the comparison for initial stone-free rate.

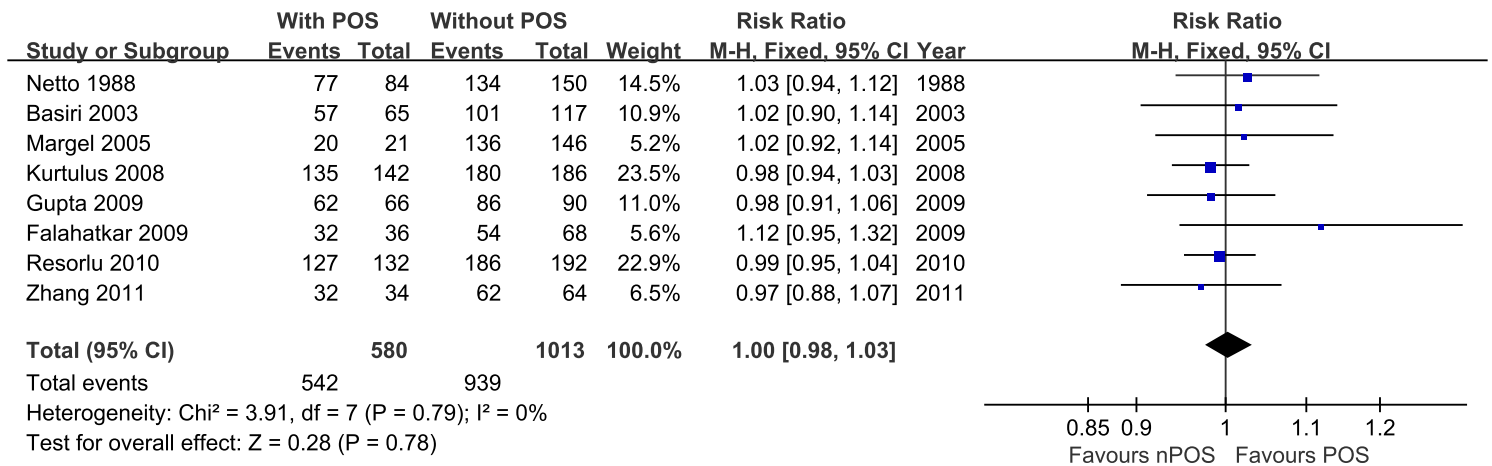

**Supplementary Figure 39.** Forest plot of the comparison for final stone-free rate. CI, confidence interval; M-H, Mantel-Haenszel; (n)POS, (non-) previous open surgery.



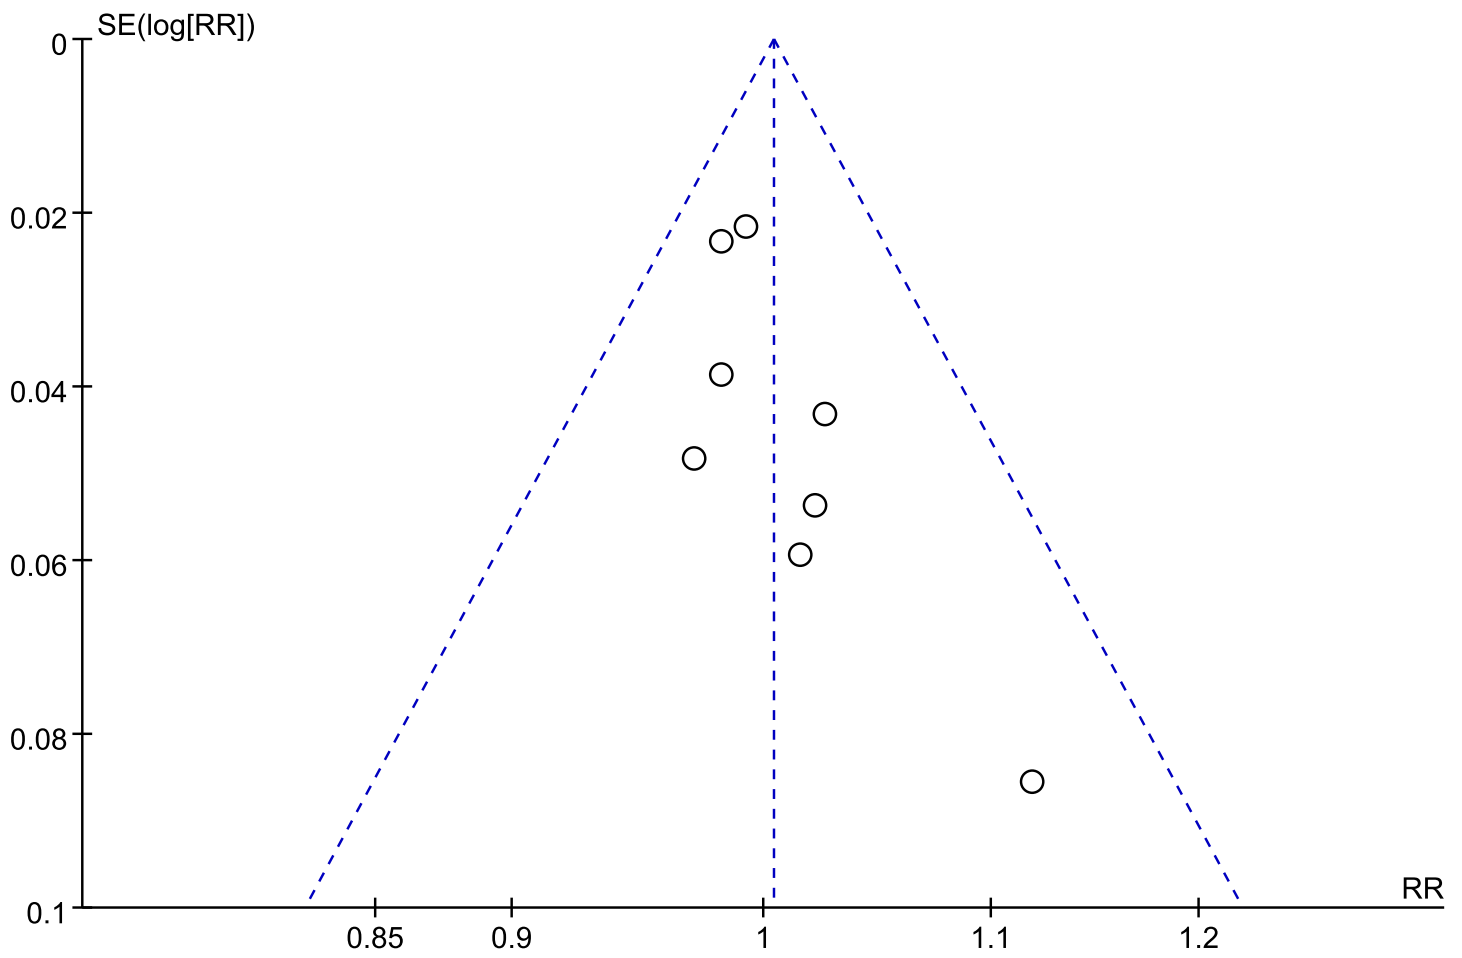

**Supplementary Figure 40.** Funnel plot of the comparison for final stone-free rate.

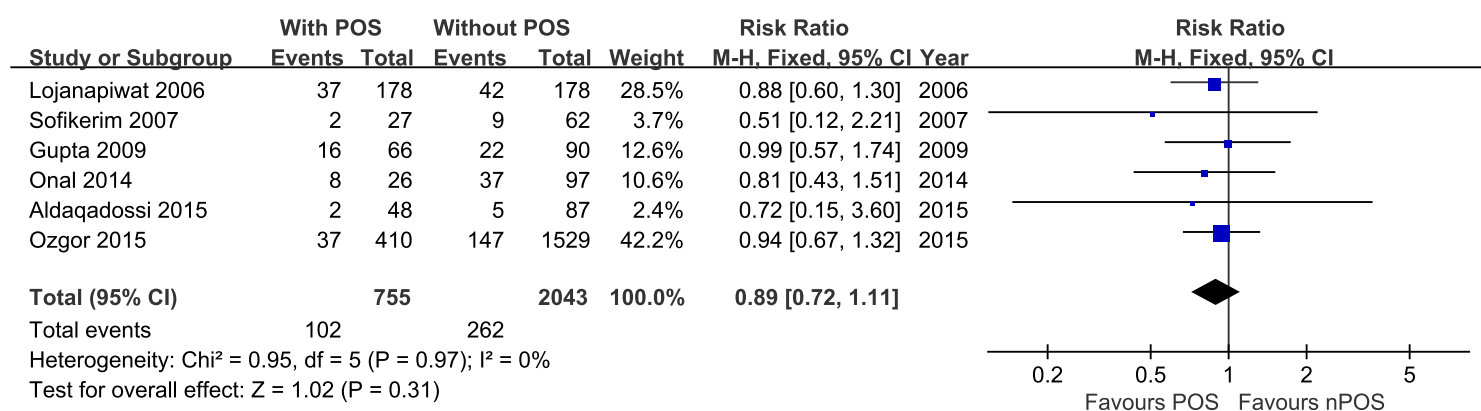

**Supplementary Figure 41.** Forest plot of the comparison for supracostal access. CI, confidence interval; M-H, Mantel-Haenszel; (n)POS, (non-) previous open surgery.

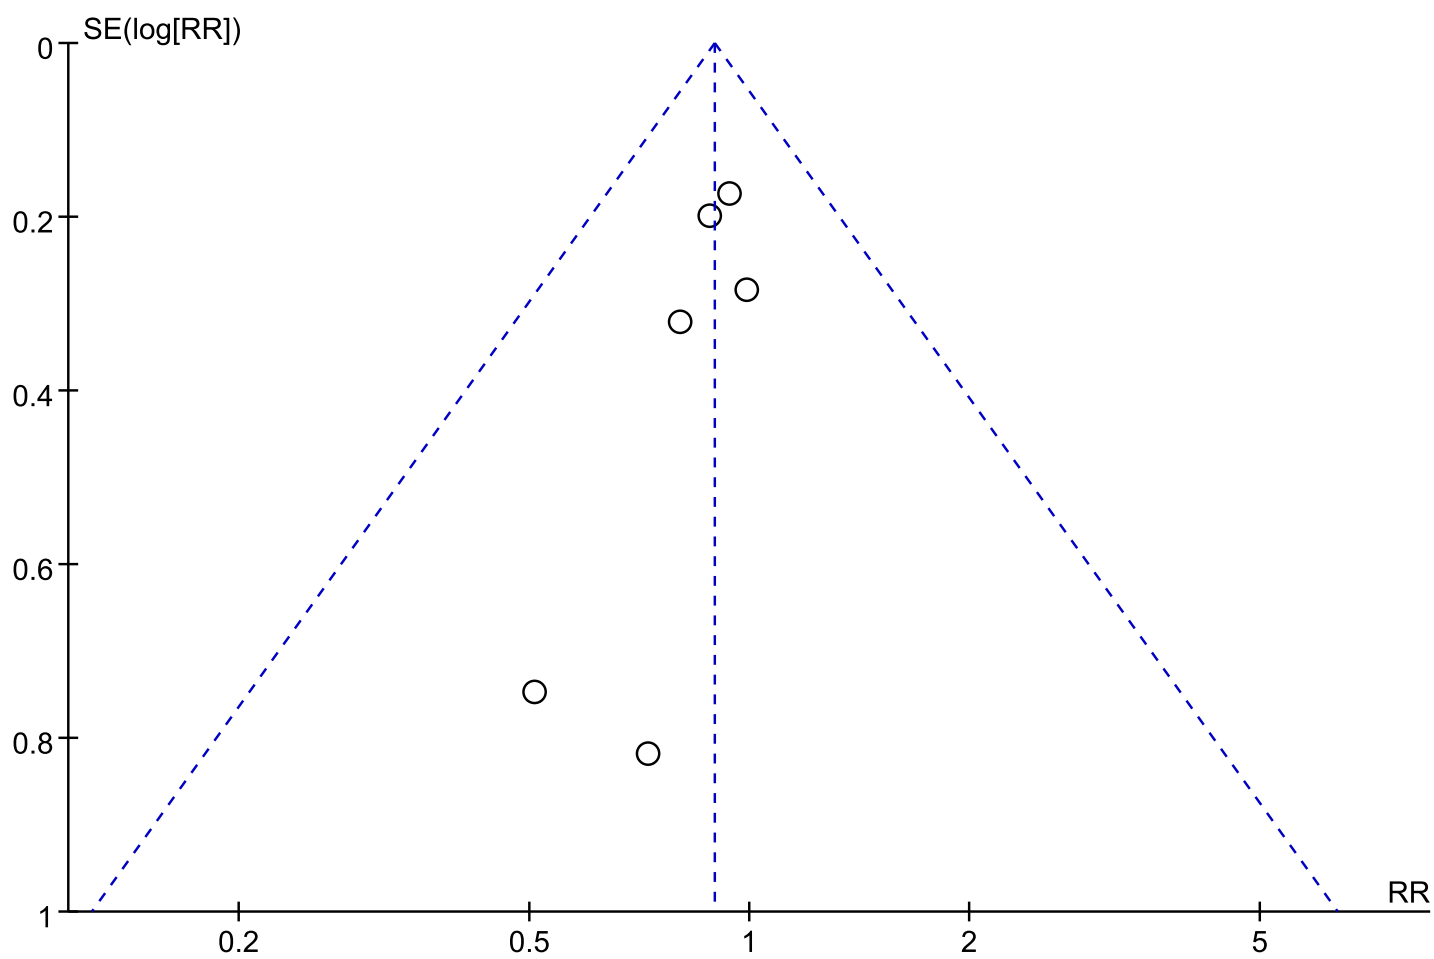

**Supplementary Figure 42** Funnel plot of the comparison for supracostal access.
